# Supplementary material for: Tearing down the barriers to exercise after mastectomy: a qualitative inquiry to facilitate exercise among breast cancer survivors
Source: PubMed Central journal article supplement — BMJ Open. 2022 Jul 27;12(7):e055157. doi: 10.1136/bmjopen-2021-055157 (PMC9335026; doi:10.1136/bmjopen-2021-055157), 2022-07-27
Supplement: bmjopen-2021-055157.draft_revisions.pdf [file bmjopen-2021-055157.draft_revisions.pdf]

# BMJ Open

BMJ Open is committed to open peer review. As part of this commitment we make the peer review history of every article we publish publicly available.

When an article is published we post the peer reviewers' comments and the authors' responses online. We also post the versions of the paper that were used during peer review. These are the versions that the peer review comments apply to.

The versions of the paper that follow are the versions that were submitted during the peer review process. They are not the versions of record or the final published versions. They should not be cited or distributed as the published version of this manuscript.

BMJ Open is an open access journal and the full, final, typeset and author-corrected version of record of the manuscript is available on our site with no access controls, subscription charges or pay-per-view fees (<http://bmjopen.bmj.com>).

If you have any questions on BMJ Open's open peer review process please email [info.bmjopen@bmj.com](mailto:info.bmjopen@bmj.com)

# BMJ Open

## Tearing down the barriers of exercise after mastectomy: A qualitative inquiry to facilitate exercise among breast cancer survivors

|                               |                                                                                                                                                                                                                                                                                                                                                                                                                                                                                                                                                                                                                                                                                                                                                                                                                                                                                                                           |
|-------------------------------|---------------------------------------------------------------------------------------------------------------------------------------------------------------------------------------------------------------------------------------------------------------------------------------------------------------------------------------------------------------------------------------------------------------------------------------------------------------------------------------------------------------------------------------------------------------------------------------------------------------------------------------------------------------------------------------------------------------------------------------------------------------------------------------------------------------------------------------------------------------------------------------------------------------------------|
| Journal:                      | <i>BMJ Open</i>                                                                                                                                                                                                                                                                                                                                                                                                                                                                                                                                                                                                                                                                                                                                                                                                                                                                                                           |
| Manuscript ID                 | bmjopen-2021-055157                                                                                                                                                                                                                                                                                                                                                                                                                                                                                                                                                                                                                                                                                                                                                                                                                                                                                                       |
| Article Type:                 | Original research                                                                                                                                                                                                                                                                                                                                                                                                                                                                                                                                                                                                                                                                                                                                                                                                                                                                                                         |
| Date Submitted by the Author: | 17-Jul-2021                                                                                                                                                                                                                                                                                                                                                                                                                                                                                                                                                                                                                                                                                                                                                                                                                                                                                                               |
| Complete List of Authors:     | Yeon, Sujin; Yonsei University, Department of Sport Industry Studies<br>Jeong, Ansuk; Yonsei University, Institute of Convergence Science<br>Min, Jihee; Yonsei University, Department of Sport Industry Studies<br>Byeon, Jiyong; Yonsei University, Department of Sport Industry Studies<br>Yoon, Yong Jin; Yonsei University, Department of Sport Industry Studies<br>Heo, Jinmoo; Yonsei University, Department of Sport Industry Studies<br>Lee, Chulwon; Yonsei University, Department of Sport Industry Studies<br>Kim, Jeeeye; Yonsei University College of Medicine, Department of Surgery<br>Park, Seho; Yonsei University College of Medicine, Department of Surgery<br>Kim, Seung Il; Yonsei University College of Medicine, Department of Surgery<br>Jeon, Justin ; Yonsei University, Department of Sport Industry Studies;<br>Yonsei University, Exercise Medicine Center for Diabetes and Cancer Patients |
| Keywords:                     | SPORTS MEDICINE, MENTAL HEALTH, ONCOLOGY                                                                                                                                                                                                                                                                                                                                                                                                                                                                                                                                                                                                                                                                                                                                                                                                                                                                                  |
|                               |                                                                                                                                                                                                                                                                                                                                                                                                                                                                                                                                                                                                                                                                                                                                                                                                                                                                                                                           |

SCHOLARONE™  
Manuscripts

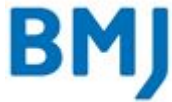

I, the Submitting Author has the right to grant and does grant on behalf of all authors of the Work (as defined in the below author licence), an exclusive licence and/or a non-exclusive licence for contributions from authors who are: i) UK Crown employees; ii) where BMJ has agreed a CC-BY licence shall apply, and/or iii) in accordance with the terms applicable for US Federal Government officers or employees acting as part of their official duties; on a worldwide, perpetual, irrevocable, royalty-free basis to BMJ Publishing Group Ltd ("BMJ") its licensees and where the relevant Journal is co-owned by BMJ to the co-owners of the Journal, to publish the Work in this journal and any other BMJ products and to exploit all rights, as set out in our [licence](#).

The Submitting Author accepts and understands that any supply made under these terms is made by BMJ to the Submitting Author unless you are acting as an employee on behalf of your employer or a postgraduate student of an affiliated institution which is paying any applicable article publishing charge ("APC") for Open Access articles. Where the Submitting Author wishes to make the Work available on an Open Access basis (and intends to pay the relevant APC), the terms of reuse of such Open Access shall be governed by a Creative Commons licence – details of these licences and which [Creative Commons](#) licence will apply to this Work are set out in our licence referred to above.

Other than as permitted in any relevant BMJ Author's Self Archiving Policies, I confirm this Work has not been accepted for publication elsewhere, is not being considered for publication elsewhere and does not duplicate material already published. I confirm all authors consent to publication of this Work and authorise the granting of this licence.

1  
2  
3  
4 Tearing down the barriers of exercise after mastectomy: A qualitative inquiry to facilitate  
5  
6 exercise among breast cancer survivors  
7  
8  
9  
10  
11  
12

13 Sujin Yeon<sup>1\*</sup>, Ansuk Jeong<sup>2\*</sup>, Jihee Min<sup>1</sup>, Jiyong Byeon<sup>1</sup>, Yong Jin Yoon<sup>1</sup>, Jinmoo Heo<sup>1</sup>,  
14  
15 Chulwon Lee<sup>1</sup>, Jeeye Kim<sup>3</sup>, Seho Park<sup>3</sup>, Seungil Kim<sup>3</sup>, & Justin Y. Jeon<sup>1,2, 4,5†</sup>  
16  
17  
18  
19

20 <sup>1</sup> Department of Sport Industry Studies, Exercise Medicine and Rehabilitation Laboratory,  
21 Yonsei University, Seoul, Korea; <sup>2</sup> Institute of Convergence Science, Yonsei University,  
22 Seoul, Korea; <sup>3</sup> Division of Breast Surgery, Department of Surgery, Yonsei University  
23 College of Medicine, Seoul, Korea; <sup>4</sup> Exercise Medicine Center for Diabetes and Cancer  
24 Patients, Yonsei University, Seoul, Korea; <sup>5</sup> Cancer Prevention Center, Yonsei Cancer  
25 Center, Shinchon Severance Hospital, Seoul, Korea  
26  
27  
28  
29  
30  
31  
32  
33  
34  
35  
36  
37  
38  
39  
40  
41  
42  
43  
44  
45  
46  
47  
48  
49  
50  
51  
52  
53  
54  
55

56 All the authors have no conflict of interest to declare.  
57  
58  
59  
60

\* These authors equally contributed to this work as first author.

† Correspondence should be addressed to: Justin Y. Jeon; Department of Sport Industry  
Studies, Yonsei University, 50 Shinchon-ro, Seoul, South Korea, 03722; jjeon@yonsei.ac.kr;  
Seungil Kim, Department of Surgery, Yonsei University College of Medicine, 50 Yonsei-ro,  
Seodaemun-gu, Seoul 120-752, Republic of Korea, skim@yuhs.ac

Word Count: 3149

## Abstract

*Objective.* Proper exercise immediately after breast cancer surgery (BCS) may prevent unnecessary physical and psychological decline resulting from surgery; however, patients' attitude, barriers, and facilitators for exercise during this period have not been studied. Hence, the current study explored the barriers and facilitators of exercise among breast cancer patients through multiple interviews from immediately after surgery until 4 weeks after BCS.

*Methods.* We conducted three in-depth interviews of 33 breast cancer patients within one month after BCS.

*Results.* We identified 44 themes, 10 codes, and 5 categories from interview results. Physical constraints and psychological resistance were identified as the barriers of exercise, while the sense of purpose and first-hand exercise experience were identified as the facilitators of exercise. By conducting the interviews over the course of 4 weeks after surgery, we monitored patterns of changes in barriers and facilitators over time. Overall, our analyses identified that the professional intervention, which considers both the time since surgery and the physical state after BCS, is essential. The intervention will counteract the overwhelming psychological resistance in the early weeks with the sense of purpose developed in the later weeks.

*Conclusions.* We made suggestions for future research and exercise intervention programs that can benefit breast cancer survivors based on the categories, codes, and themes identified in the current study.

**Keywords:** barriers to exercise; breast cancer; cancer survivors; exercise intervention; exercise promotion; facilitators of exercise; professional support

## Strengths and Limitations

- This is the first study to investigate the barriers and facilitators of exercise immediately after the breast cancer surgery

- Multiple interviews are conducted per participants to examine the effect of time.
- Participants were recruited via one cancer center, if one of the largest one in the country.

For peer review only

## BACKGROUND

The incidence of breast cancer is increasing continuously. Currently, breast cancer is the most common cancer among women, accounting for 24.2% of the cases worldwide and 20.3% of the cases in South Korea.<sup>1</sup> Although the 5-year survival rate of breast cancer is over 93%, substantial number of breast cancer patients experience breast cancer recurrence and suffer from side effects of cancer treatments. Although the rate of breast-conserving surgery has increased from 37.6% in 2002 to 67.4% in 2017, many breast cancer patients develop both short-term and long-term physical impairments such as lymphedema and decreased shoulder strength and range of motion (ROM).<sup>2-5</sup> In addition to physical impairment, the prevalence of depression, distress, anger, and social isolation is high among breast cancer survivors.<sup>6</sup>

Exercise and physical activity (PA) improve the prognosis of breast cancer (e.g., decrease breast cancer-specific and all-cause mortality).<sup>7</sup> The benefit of exercise among breast cancer patients is not limited to improvement in survival. Early implementation of exercises may reduce surgery-related complications,<sup>8</sup> pain,<sup>9</sup> and risk of lymphedema.<sup>10</sup> Implementation of exercises such as shoulder ROM and isometric and passive stretching shortly after surgery could improve shoulder ROM during early recovery after surgery.<sup>11</sup>

Although ample evidence exists on the benefits of exercise for recovery after breast cancer surgery (BCS),<sup>12</sup> breast cancer patients are reluctant to participate in exercise during early recovery. Furthermore, few studies have investigated the attitude toward exercise and exercise experience, barriers, and facilitators over the course of time, especially immediately after BCS until 4 weeks after surgery. A few qualitative studies have investigated these factors in cancer survivors after a few months of surgery.<sup>13-15</sup> Particularly, considering the potentially different needs of the breast cancer survivors based on the time passed after surgery, more information on the barriers and facilitators of exercise immediately after BCS can be useful in tailoring exercise intervention programs to the actual needs of breast cancer survivors.

1  
2  
3  
4 In those regards, the current study investigated the factors related to exercise  
5 promotion within one month after BCS. More specifically, by employing the in-depth interview  
6 method, the study investigated: (1) the barriers and the facilitators of exercise for breast cancer  
7 survivors; (2) the changes in these factors according to time after BCS. Additionally, the  
8 current study aimed to complement the intentions expressed in the interviews with the actual  
9 behaviors based on the quantitative data on PA.  
10  
11  
12  
13  
14  
15  
16

## 17 **METHODS**

### 18 **Participants**

19  
20 We recruited 33 women who underwent BCS at the breast cancer center of a university  
21 medical center in Seoul, Korea, between February 14, 2019 and November 12, 2019, using the  
22 criterion sampling technique.<sup>16</sup> Patients who were over 70 years old, had undergone bilateral  
23 or reconstruction surgery, or had a history of previous cancer were excluded. The recruitment  
24 of new participants was stopped when new data from additional participants did not add new  
25 ideas or concepts related to the purpose of the study.<sup>17</sup>  
26  
27  
28  
29  
30  
31  
32  
33  
34  
35

### 36 **Ethics Approval Statement**

37  
38 This study was approved by the Institutional Review Board of the hospital (IRB No.  
39 4-2018-1094). All participants provided written informed consent and agreed to be interviewed  
40 multiple times within one month after BCS.  
41  
42  
43  
44

### 45 **Patient and Public Involvement**

46  
47 The research team has conducted numerous studies on the exercise intervention for the  
48 people with cancer. Those who had gone through BCS, in particular, inspired the team to  
49 contemplate on the conflicts between the needs for exercise and the fear about the aftereffects  
50 of exercise. Based on the observations from previous contacts, the team initiated the current  
51 study to get the insights on the way to help them exercise more as a means to overcoming the  
52 aftereffects of BCS.  
53  
54  
55  
56  
57  
58  
59  
60



1  
2  
3  
4 Because of the scanty literature on the patients immediately after BCS, the team  
5 decided to employ qualitative approach to listen to the patients' experience. Electronic medical  
6 records were screened and potential participants who met all the inclusion criteria were  
7 contacted by the physician to explain the research participation opportunity. Patients who  
8 agreed to participate in multiple interviews after BCS signed the informed consent. The same  
9 procedure was repeated until the saturation point.<sup>16</sup> Three of 36 participants withdrew (one  
10 patient dropped out because of re-surgery and the other two refused to participate); thus, 33  
11 patients participated in the current study.  
12  
13  
14  
15  
16  
17  
18  
19  
20  
21

22 The research participants met with the first author of the current study one day before  
23 BCS. This initial meeting was to build a good collaborative relationship between the researcher  
24 and the participant. After BCS, the interview was conducted three times during clinic visits:  
25 first interview, within two weeks after surgery; second interview, in two to three weeks after  
26 surgery; and third interview, within one month after surgery. To ensure the privacy of the  
27 participants, face-to-face interviews were conducted. All interviews were conducted in Korean.  
28 After the third interview, a professional exercise consultation was provided as a compensation  
29 for research participation.  
30  
31  
32  
33  
34  
35  
36  
37  
38  
39  
40

41 Each in-depth interview session lasted for 10–40 minutes. With the participants'  
42 permission, the interviews were audio-recorded and transcribed verbatim. Two different semi-  
43 structured interview questionnaires were used (Table 1).  
44  
45  
46  
47

48 Table 1. Interview questionnaires  
49

| Interview | Questions                                                                                                                                                                                                                                                                                                                                                                                                                                                                                                                                                                                                                                                                              |
|-----------|----------------------------------------------------------------------------------------------------------------------------------------------------------------------------------------------------------------------------------------------------------------------------------------------------------------------------------------------------------------------------------------------------------------------------------------------------------------------------------------------------------------------------------------------------------------------------------------------------------------------------------------------------------------------------------------|
| 1st       | <ul style="list-style-type: none"> <li data-bbox="416 1742 767 1776">• How is the surgery site?</li> <li data-bbox="416 1783 1054 1816">• Are there any functional changes in your arm?</li> <li data-bbox="416 1823 1390 1890">• Are there any changes in your daily-living activities such as doing chores, putting clothes on, and washing dishes?</li> <li data-bbox="416 1897 1158 1930">• Did you exercise during the past week (after surgery)?               <ul style="list-style-type: none"> <li data-bbox="456 1937 1031 1971">• If yes, how often? Why did you exercise?</li> <li data-bbox="456 1977 911 2011">• If no, why did you not exercise?</li> </ul> </li> </ul> |

---

|             |                                                                                                                                                                                                                                                                                                                                                                                                                            |
|-------------|----------------------------------------------------------------------------------------------------------------------------------------------------------------------------------------------------------------------------------------------------------------------------------------------------------------------------------------------------------------------------------------------------------------------------|
| 2nd and 3rd | <ul style="list-style-type: none"><li>• Compared to the last week, is there any change at the surgery site?</li><li>• Compared to the last week, are there any changes in your activities of daily living?</li><li>• Did you exercise during the past week (after surgery)?<ul style="list-style-type: none"><li>• If yes, how often? Why did you exercise?</li><li>• If no, why did you not exercise?</li></ul></li></ul> |
| 3rd         | <ul style="list-style-type: none"><li>• Could you specify the biggest barriers and facilitators of exercise for the past month?</li><li>• Would you like say anything to other breast cancer survivors?</li></ul>                                                                                                                                                                                                          |

---

In addition, detailed field notes were taken. Before and after each interview, the interviewer examined the area in which the interviewee reported pain, observed physical changes in the interviewee, and included them in the notes. Moreover, the interviewer noted the insights from the interview process and interactions.

The complementary measurement of the participants' PA level was performed during each interview using the Global PA Questionnaire (GPAQ), developed by the World Health Organization (WHO).<sup>18</sup> The GPAQ comprises 16 items in four domains of PA: work, leisure time, transportation, and sedentary behavior. Participants reported the amount of moderate or vigorous activities related respectively to work or leisure time. The reliability and validity of the Korean version of the GPAQ were examined in a previous study.<sup>19</sup> We added a measure of walking and its frequency and duration, which is not included in the original GPAQ but is relevant to the current study.

### **Characteristics of Researchers**

The research team of the current study is composed of two breast surgeons, a psychologist, and four exercise specialists. All interviews were conducted by an exercise specialist (SJY). The leader of exercise specialists (JYJ) has been working with cancer patients for over 10 years, developing and testing exercise programs tailored for various cancer patients under different conditions. The interpretation and categorization of the interview results were discussed among team members, (two breast surgeons [JYK and SIK], a psychologist [ASJ],

1  
2  
3  
4 and exercise specialists [SJY, JHM, JYB, and JYJ]).  
5

### 6 **Trustworthiness**

7  
8  
9 To increase the trustworthiness of data,<sup>20</sup> we have employed three different methods:  
10  
11 reflective note, observation, and member check. After each interview, the exercise specialist  
12  
13 reflected on their performance as an interviewer. Mistakes and important lessons learnt were  
14  
15 recorded in a reflective note and methods to improve the quality and depth of interviews were  
16  
17 practiced before the next interview. A sufficient amount of time was spent observing  
18  
19 participants' physical performance and symptoms including shoulder ROM, strength, pain, and  
20  
21 other medical treatment. To increase the reliability of the findings, interviews were conducted  
22  
23 three times over four weeks as participants underwent treatment. The transcript and summary  
24  
25 of each interview were confirmed by the participants to ensure the transcriptions and  
26  
27 summaries correctly reflected what they intended to express.  
28  
29  
30

### 31 **Analysis**

32  
33  
34 Guided by the Grounded Theory,<sup>21</sup> the team started with open coding, identifying the  
35  
36 themes that emerged from the verbatim transcripts. In addition, the field notes were included  
37  
38 in the analysis to avoid loss of non-verbal information. Immediately after the team agreed on  
39  
40 the first group of themes collectively, the authors worked on the subsequent transcripts  
41  
42 individually. The team conducted regular meetings and worked on abstracting the codes and  
43  
44 then the categories to proceed to the selective coding collectively. During the constant  
45  
46 comparative analysis, member checking was performed to increase the validity of the analysis.  
47  
48 The analysis results were sent to three randomly selected interviewees to confirm the meaning  
49  
50 and nuance of answers, and thereby, their experience as breast cancer survivors.  
51  
52  
53

54  
55 Complementary quantitative data analysis was performed using a repeated measures  
56  
57 analysis of variance to compare the means of PA total and walk, before surgery and during the  
58  
59 first, second, and third interview.  
60

## RESULTS

### Participant Description

The characteristics of the 33 participants are presented in Table 2. Characteristics such as age, weight, surgery type, cancer stage, dominant arm, operation side, post-operative day (POD, from 1 through 30 days), and whether they had neo-adjuvant chemotherapy were analyzed.

Table 2. Characteristics of the participants REDACTED DUE TO POTENTIAL IDENTIFYING INFORMATION – PLEASE SEE PUBLISHED VERSION

### *Intervention Needed in Time for Physical Recovery*

The interviewees identified multiple factors that either facilitated participants to exercise more or hinder them from exercising after BCS. Out of the 44 themes that emerged from the interviews, 10 codes and 5 categories were identified (Table 3). Physical constraints and psychological resistance were identified as the barriers for exercise, whereas the sense of purpose and first-hand exercise experience were identified as the facilitators for exercise during the early stage of rehabilitation after BCS. The overwhelming physical constraints that produced psychological resistance in the earlier weeks after surgery appeared to be gradually substituted by the sense of purpose that derived from the first-hand experience encouraged by diverse sources. This conclusion is consistent with the PA data: the motivation to perform exercise and PA materialized with time (Table 4). Quantitative data of 31 participants were collected and analyzed. Analysis revealed that the total PA level statistically significantly changed over time ( $F = 3.64, p < .05$ ). The supportive intervention that reflects an individual patient's physical condition can expedite the substitution process, if provided properly. Our analyses revealed the core variable that answered our research questions was "*intervention needed in time for physical recovery*" to meet the varying needs of the survivors according to

the time after BCS (Figure 1).

Table 3. Themes, codes, and categories from the interviews

| Categories                      | Codes                                          | Themes                                                                                 |
|---------------------------------|------------------------------------------------|----------------------------------------------------------------------------------------|
| Physical constraints            | Postoperative syndrome                         | Lymphedema, seroma                                                                     |
|                                 |                                                | Pain                                                                                   |
|                                 |                                                | Limited mobility of the arm                                                            |
|                                 | Operation-derived condition                    | Feeling weak                                                                           |
|                                 |                                                | Drain                                                                                  |
| Non-operation-derived condition | Neoadjuvant therapy                            |                                                                                        |
|                                 | Pre-existing physical condition                |                                                                                        |
| Psychological resistance        | Perception and attitude                        | Believing that daily living activities are sufficient                                  |
|                                 |                                                | Unaware of the requirement of exercise                                                 |
|                                 |                                                | Exercise not prioritized                                                               |
|                                 |                                                | Not wanting to burden the body                                                         |
|                                 |                                                | Lack of self-efficacy regarding exercise                                               |
|                                 | Concerns from the lack of accurate information | Psychological withdrawal                                                               |
|                                 |                                                | Concerns regarding the potential side-effects of exercise                              |
|                                 |                                                | Concerns regarding injuries                                                            |
|                                 |                                                | Concerns regarding the timing being inappropriate                                      |
|                                 |                                                | Concerns regarding the etiology and symptoms of the cancer – related to exercise       |
| Sense of purpose                | Encouragement and support                      | Own theory regarding the etiology and the symptoms of the cancer – related to exercise |
|                                 |                                                | From family                                                                            |
|                                 |                                                | From medical professionals                                                             |
|                                 |                                                | From exercise therapists                                                               |
|                                 |                                                | From other cancer patients                                                             |
|                                 | Expected benefits                              | From media                                                                             |
|                                 |                                                | Speed up the recovery                                                                  |
|                                 |                                                | Recover from the postoperative syndrome                                                |
|                                 |                                                | Health management                                                                      |
|                                 |                                                | Muscular strength                                                                      |
|                                 |                                                | Increase muscle mass                                                                   |
|                                 |                                                | Improve flexibility                                                                    |
|                                 |                                                | Prevent relapse by promoting health                                                    |
|                                 |                                                | General physical health                                                                |
|                                 |                                                | Break unhealthy lifestyle                                                              |

|                       |                                    |                                                                                                                                                    |
|-----------------------|------------------------------------|----------------------------------------------------------------------------------------------------------------------------------------------------|
|                       |                                    | Prevent weight gain<br>Maintain healthy lifestyle                                                                                                  |
| First-hand experience | Benefits of exercise               | Reduced pain<br>Promoted flexibility<br>Increased amount of exercise<br>Increased physical activities<br>Reduced discomforts<br>Expedited recovery |
|                       | Heightened sense of purpose        | Attribution of cancer to the lack of exercise<br>Want to exercise more                                                                             |
| Intervention needed   | Accurate information and education | Want consultation regarding symptoms<br>Want information/education in accordance with the proper timing                                            |

Table 4. Comparison of physical activity (N = 31)

|                     | Before surgery | 1st interview | 2nd interview | 3rd interview | F     |
|---------------------|----------------|---------------|---------------|---------------|-------|
|                     | M (SD)         | M (SD)        | M (SD)        | M (SD)        |       |
| VPA (min/week)      | 0              | 0             | 0             | 0             | N/A   |
| MPA (min/week)      | 41.0 (113.4)   | 0             | 0             | 12.3 (54.1)   | N/A   |
| Total PA (min/week) | 142.6 (167.6)  | 49.8 (61.6)   | 96.1 (175.4)  | 142.6 (161.9) | 3.64* |
| Walk (min/week)     | 204.4 (208.0)  | 142.1 (165.3) | 173.1 (139.1) | 222.9 (166.4) | 2.31  |

MPA, moderate physical activity; M (SD), mean (standard deviation); VPA, vigorous physical activity.

\* $p < .05$

### Barriers to Exercise

*Physical Constraints.* Breast cancer patients who underwent surgery experienced multiple types of physical restraints, which made it hard for them to participate in or even to think about exercise. Most frequently reported barrier to exercise was pain, followed by limited shoulder ROM and frequent by-products of the treatment including seroma and the drain attached to the body. All these contributed to a sense of weakness throughout the body, especially among those who received neo-adjuvant chemotherapy.

*"I couldn't exercise after the surgery. I am not eating well and do not feel*

1  
2  
3  
4 *strong. It's not just my arm that feels weak; my whole body feels weak. I lay inert*  
5  
6 *or just sat leaning on something, most of the time.*" (Participant #19, PM/ALND,  
7  
8 first interview)  
9

10  
11 *"(After the drain was removed) This (seroma) started leaking and I felt so*  
12  
13 *distressed. It stressed me out. Only a few drops, you know, when it leaks, are*  
14  
15 *enough to feel so awkward. Thinking about it, I couldn't exercise. This past week*  
16  
17 *was more uncomfortable.*" (Participant #19, PM/ALND, third interview)  
18  
19

20  
21 *Psychological Resistance.* The physical constraints paved a way for the participants to  
22  
23 feel entitled to not exercise because they believed that "physical activities may be harmful or  
24  
25 at least drain their energy." Moreover, although the physical condition permitted, participants  
26  
27 did not feel motivated enough to exercise. Sometimes, their anxiety regarding possible injuries  
28  
29 in exercising undermined their wish to become more physically active. Other times, they  
30  
31 excused themselves from doing more exercise as "daily living and house chores are good  
32  
33 enough exercise." In addition to these concerns and excuses, their pre-existing perception and  
34  
35 attitude that did not prioritize exercise appeared to discourage them from exercising after  
36  
37 surgery.  
38  
39

40  
41 *"Well, I didn't do much. I couldn't exercise at all because of the pain. The*  
42  
43 *armpit feels tight and poking. What if moving causes more pain? Worried about it,*  
44  
45 *I can't exercise..*" (Participant #27, TM/SLNB, third interview)  
46  
47

48  
49 *"I couldn't exercise... Well, I thought of looking over the booklet (of exercise*  
50  
51 *education), but didn't. I don't recall why I didn't, but time passed while I was*  
52  
53 *taking care of my grandkids. I put it on the dining table and didn't reach for it*  
54  
55 *later. I did try stretching my arm lying down on the bed. It wasn't painful though.*"  
56  
57 (Participant #13, PM/SLNB, first interview)  
58

59  
60 Notwithstanding, the lack of accurate information was identified as a significant

1  
2  
3  
4 reason for the patients to not take courage to exercise. After surgery, considering all the  
5  
6 byproducts of operation, whether anticipated or unanticipated, patients' anxiety was not  
7  
8 ungrounded. Accurate information regarding the types of activities and exercises that speed  
9  
10 up the recovery from diverse postoperative symptoms was important.  
11  
12

13 *“Well, I can't find the information I need.. when should I work on muscles,*  
14 *when can I jog or run.. I don't know..”* (Participant #33, PM/SLNB, first  
15  
16 interview)  
17  
18  
19

20 Often, different health professionals such as surgeons, medical oncologists,  
21  
22 physiatrists, and plastic surgeon (in case patients underwent breast reconstruction) provided  
23  
24 different information on when and how to exercise. Lack of information or inconsistent  
25  
26 information was the barrier to exercise for breast cancer patients.  
27  
28

### 29 **Facilitators of Exercise**

30  
31 *Accurate Information.* Accurate information on exercise according to the time after  
32  
33 surgery was identified as the key facilitator to promote exercise among patients. The patients  
34  
35 expressed their wish to have some professional consultation regarding exercise interventions  
36  
37 that take their symptoms and health conditions into account.  
38  
39

40  
41 *Encouragement and Support.* In the process of recovery after BCS, patients reported  
42  
43 social support as an important factor that motivated them to exercise more. Diverse sources  
44  
45 worked, including medical professionals, exercise therapists, friends, family members, as  
46  
47 well as fellow cancer patients.  
48  
49

50 *“(Other patients in this rehab center says) You have to exercise. Otherwise,*  
51 *it'll become stiff. Those who have experienced something like myself informed me*  
52 *to do this and that, even regarding how to wash up. It's a great help from these*  
53 *folks who have been or are going through the similar experiences (treatment*  
54 *processes).. It's good.”* (Participant #28, PM/ALND, third interview)  
55  
56  
57  
58  
59  
60



1  
2  
3  
4 *First-hand Experience.* The participants reported their first-hand experience as an  
5 important motivator for exercise. They increased the activity level and exercised more after  
6 knowing the positive effects of exercise through experience.  
7  
8

9  
10  
11 *“The more I exercise, the larger this angle becomes. It was really hard to*  
12 *follow the instructions when I wasn’t working out. The more I tried, however, the*  
13 *easier it became. So I realized the importance (of exercise). If I do not exercise, it*  
14 *will be harder. So whenever it pops up in my mind, I try to do some exercise. Even*  
15 *in waking up, I tried to do some arm stretching.”* (Participant #24, TS/SLNB,  
16  
17  
18  
19  
20  
21  
22  
23 second interview)

24  
25 *Sense of Purpose.* All the aforementioned factors contributed to the patients’ sense of  
26 purpose, expecting the benefits of exercise. The expectation included pain reduction, fast  
27 recovery, relapse prevention, and health management. The patients who had mastectomy tried  
28 to motivate themselves to exercise more. In addition, they frequently expressed their wish to  
29 increase physical strength, muscle mass, and flexibility, as well as to maintain a healthy  
30 lifestyle.  
31  
32  
33  
34  
35  
36  
37

38  
39 *“(People say) It takes 3 months to recover from the surgery, but recovery is up*  
40 *to me, I figure. Exercising and building muscles are up to me. So I do exercise.”*  
41  
42  
43 (Participants #2, TM/SLNB, third interview)  
44

45  
46 *“I think I got cancer because I had not exercised... There’s no other reason.*  
47 *You know, there’s no known cause for the triple negative breast cancer.. I guess*  
48 *it’s from my not exercising... So I do exercise now, do walking at least.”*  
49

50  
51  
52 (Participant #9, PM /SLNB, second interview)  
53

## 54 **How Time Works**

55  
56  
57 During the current study, the participants showed a certain pattern related to the time  
58 after BCS. Diverse factors contributed to the heightened psychological resistance, resulting in  
59  
60

1  
2  
3  
4 no or minimal exercising, in the early weeks after BCS. However, with time and the support of  
5 professional and social contacts, the patients expressed an increased sense of purpose. Support  
6 from external sources, as well as own first-hand experience, produced this sense of purpose.  
7  
8 The motivation along with proper instruction of tailored exercise intervention is projected to  
9 offset the psychological resistance in the early weeks after BCS (Figure 1). This pattern is  
10 consistent with the participants' actual amount of PA participation, which increased gradually  
11 from immediately after surgery to four weeks after surgery (Table 4).  
12  
13  
14  
15  
16  
17  
18  
19

## 20 **DISCUSSION**

### 21 **Summary of Results**

22  
23 We employed an in-depth interview technique repeatedly within one month after BCS  
24 and identified the barriers and facilitators of exercise among breast cancer survivors. Physical  
25 constraints that were prominent in the early weeks, as reported in the literature,<sup>22-23</sup> along with  
26 the pre-existing perception and attitude toward exercise developed psychological resistance to  
27 exercise among the patients. However, an increase in motivation to exercise was observed  
28 among patients in later weeks thanks to more encouragement from others, as was reported in  
29 other studies,<sup>24-26</sup> and higher sense of purpose from their own experience.  
30  
31  
32  
33  
34  
35  
36  
37  
38  
39  
40

41 This process of increasing the sense of purpose, replacing the psychological resistance,  
42 seemed to be propelled by a professional intervention that reflected the timing of right exercise.  
43 There was no disagreeing among the participants that more accurate information and education  
44 were required to promote exercise. Multiple physical, psychological, and environmental  
45 circumstances served as conditions for psychological resistance among patients. The resistance  
46 grounded on the anxiety and fear of unintended injuries and unanticipated side-effects as a  
47 cancer survivor can only be managed with professional diagnosis and prescription of exercise.  
48 The complementary PA data revealed that patients' sense of purpose was positively associated  
49 with their actual amount of PA participation, reinforcing the requirement for professional  
50  
51  
52  
53  
54  
55  
56  
57  
58  
59  
60

1  
2  
3  
4 intervention at the right time.  
5

### 6 **Study Limitations and Strengths**

7  
8  
9 This qualitative study included only 33 participants. Hence, generalization of the  
10 results to all breast cancer survivors should be made with caution. Particularly, considering that  
11 the recruiting site was one of the major general hospitals in Korea, the lived experiences of  
12 people living in rural areas or those treated in smaller hospitals, for instance, could not be  
13 captured in the current study. Therefore, to advance our understanding regarding the  
14 professional intervention that was identified as the key factor to promote exercise among the  
15 participants, a randomized control study should be performed. The long-term and short-term  
16 physical as well as psychological benefits of exercise can be examined more comprehensibly  
17 by investigating the effects of exercise intervention, preferably in a longitudinal study.  
18  
19  
20  
21  
22  
23  
24  
25  
26  
27  
28

29 The strengths of the current study included repeated interviews over four weeks after  
30 surgery which enable us to observe the change in patients' attitude toward exercise over time.  
31 Especially, in the current study, breast cancer patients were interviewed from only one week  
32 after surgery before implementation of exercise or rehabilitation intervention; however, recent  
33 studies have reported the importance of early exercise intervention after surgery in cancer  
34 patients.  
35  
36  
37  
38  
39  
40  
41  
42

### 43 **Clinical Implications**

44  
45 To mitigate the constant feedback loop between physical and psychological excuses,  
46 a clever exercise intervention should be designed. Considering the diverse anxiety expressed  
47 in the current study, tailored programs should consider each patient's physical and  
48 psychological needs to optimize the potential effects of the program.  
49  
50  
51  
52  
53  
54

55 Many breast cancer patients do not participate in PA and experience significant muscle  
56 mass loss during the first few months after surgery, which is associated with increased risk of  
57 type 2 diabetes and worse prognosis, including increased risk of recurrence.<sup>27-28</sup> The findings  
58  
59  
60

1  
2  
3  
4 of the current study revealed that breast cancer patients can benefit from early participation of  
5  
6 exercise and PA, which may prevent loss of shoulder ROM and strength after BCS. In addition,  
7  
8 the current study provides information regarding the attitude of breast cancer patients toward  
9  
10 exercise during the early recovery stage after surgery and thus, promotes the development of  
11  
12 appropriate intervention strategies.  
13  
14

### 15 16 **Conclusions**

17  
18 Thirty-three breast cancer survivors shared their experience and thoughts regarding  
19  
20 exercise after BCS. Commonly expressed needs of the participants were summed as a  
21  
22 professional intervention that takes into account the time after surgery and each individual's  
23  
24 physical condition. Exercise was not only a matter of motivation and will power, but also a  
25  
26 matter of resources that can be used with physical and psychological comfort.  
27  
28  
29  
30  
31  
32  
33  
34  
35  
36  
37  
38  
39  
40  
41  
42  
43  
44  
45  
46  
47  
48  
49  
50  
51  
52  
53  
54  
55  
56  
57  
58  
59  
60

### **Contributorship statement**

SJY and JYJ participated in study design. SJY, JHM, JYK, SIK and JYJ participated in data collection. SJY, ASJ, JHM, JYB, JYK, SHP, SIK and JYJ participated in data analysis and interpretation. ASJ, SJY, CWL, YJY, JMH and JYJ participated in the manuscript writing. All authors participated in the manuscript review and revision.

### **Competing interests**

None declared.

### **Funding**

This work was supported by the National Research Foundation of Korea grant number NRF-2017S1A5A2A01024689.

### **Data sharing statement**

Data are available upon reasonable request. Interview transcripts will be available upon request on the specific area of interest.

Figure 1. Relations among categories according to time, which changes the weight of the barriers and facilitators of exercise

## References:

1. Cancer.go.kr [homepage on the internet]. National Cancer Information Center: Ministry of Health and Welfare; [Cited 2021 January 9]. Available from: <https://www.cancer.go.kr/>
2. Nccn.org [homepage on the internet]. National Comprehensive Cancer Network; [Cited 2021 Jun 8]. Available from: [https://www.nccn.org/professionals/physician\\_gls/pdf/breast.pdf](https://www.nccn.org/professionals/physician_gls/pdf/breast.pdf)
3. Ebaugh D, Spinelli B, Schmitz KH. Shoulder impairments and their association with symptomatic rotator cuff disease in breast cancer survivors. *Med Hypotheses* 2011;77(4):481-487.
4. Fabro EAN, Bergmann A, e Silva BdA, et al. Post-mastectomy pain syndrome: incidence and risks. *The Breast* 2012;21(3):321-325.
5. Hayes SC, Johansson K, Stout NL, et al. Upper-body morbidity after breast cancer: incidence and evidence for evaluation, prevention, and management within a prospective surveillance model of care. *Cancer* 2012;118(S8):2237-2249.
6. Golden-Kreutz DM, Andersen BL. Depressive symptoms after breast cancer surgery: Relationships with global, cancer-related, and life event stress. *Psychooncology* 2004;13(3):211-220.
7. Spei M-E, Samoli E, Bravi F, et al. Physical activity in breast cancer survivors: A systematic review and meta-analysis on overall and breast cancer survival. *The Breast* 2019;44:144-152.
8. Ten Wolde B, Kuiper M, de Wilt JH, et al. Postoperative complications after breast cancer surgery are not related to age. *Ann Surg Oncol* 2017;24(7):1861-1867.
9. Sagen A, Kaaresen R, Sandvik L, et al. Upper limb physical function and adverse effects after breast cancer surgery: a prospective 2.5-year follow-up study and preoperative measures. *Arch Phys Med Rehabil* 2014;95(5):875-881.
10. Lacomba MT, Sánchez MJY, Goñi ÁZ, et al. Effectiveness of early physiotherapy to prevent lymphoedema after surgery for breast cancer: randomised, single blinded, clinical trial. *BMJ* 2010;340:b5396.
11. Cinar N, Seckin Ü, Keskin D, et al. The effectiveness of early rehabilitation in patients with modified radical mastectomy. *Cancer Nurs* 2008;31(2):160-165.
12. Möller UO, Beck I, Rydén L, et al. A comprehensive approach to rehabilitation interventions following breast cancer treatment-a systematic review of systematic reviews. *BMC Cancer* 2019;19(1):1-20.
13. Andrade RD, Junior GJF, Capistrano R, et al. Constraints to leisure-time physical activity among Brazilian workers. *Ann Leis Res* 2019;22(2):202-214.
14. Payán DD, Sloane DC, Illum J, et al. Intrapersonal and environmental barriers to physical activity among Blacks and Latinos. *J Nutr Educ Behav* 2019;51(4):478-485.
15. Son JS, Chen G, Liechty T, et al. The Role of Facilitators in the Constraint Negotiation of Leisure-Time Physical Activity. *Leis Sci* 2021:1-20.
16. Patton MQ. Qualitative evaluation and research methods: SAGE Publications, Inc; 1990.
17. Guest G, Bunce A, Johnson L. How many interviews are enough? An experiment with data saturation and variability. *Field methods* 2006;18(1):59-82.
18. Armstrong T, Bull F. Development of the world health organization global physical activity

1  
2  
3  
4  
5 questionnaire (GPAQ). *J Public Health* 2006;14(2):66-70.

6 19. Lee J, Lee C, Min J, et al. Development of the Korean Global Physical Activity Questionnaire:  
7 reliability and validity study. *Glob Health Promot* 2020;27(3):44-55.

8 20. Lincoln YS, Guba EG. *Naturalistic inquiry*. Thousand Oaks CA: Sage; 1985.

9 21. Corbin J, Strauss A. *Basics of Qualitative Research: Techniques and Procedures for*  
10 *Developing Grounded Theory*. Newbury Park: Sage Publications; 1998.

11 22. Shamley D, Srinaganathan R, Oskrochi R, et al. Three-dimensional scapulothoracic motion  
12 following treatment for breast cancer. *Breast Cancer Res Treat* 2009;118(2):315-322.

13 23. Baron RH, Kelvin JF, Bookbinder M, et al. Patients' sensations after breast cancer surgery:  
14 a pilot study. *Cancer Practice* 2000;8(5):215-222.

15 24. Abe M, Iwase T, Takeuchi T, et al. A randomized controlled trial on the prevention of  
16 seroma after partial or total mastectomy and axillary lymph node dissection. *Breast Cancer*  
17 1998;5(1):67-69.

18 25. Gillis C, Li C, Lee L, et al. Prehabilitation versus rehabilitation: a randomized control trial in  
19 patients undergoing colorectal resection for cancer. *Anesthesiology* 2014;121(5):937-947.

20 26. Jones LW, Courneya KS, Fairey AS, et al. Effects of an oncologist's recommendation to  
21 exercise on self-reported exercise behavior in newly diagnosed breast cancer survivors: a single-  
22 blind, randomized controlled trial. *Ann Behav Med* 2004;28(2):105-113.

23 27. Pan K, Chlebowski RT, Mortimer JE, et al. Insulin resistance and breast cancer incidence and  
24 mortality in postmenopausal women in the Women's Health Initiative. *Cancer* 2020;126(16):3638-  
25 3647.

26 28. Caan BJ, Feliciano EMC, Prado CM, et al. Association of muscle and adiposity measured by  
27 computed tomography with survival in patients with nonmetastatic breast cancer. *JAMA Oncol*  
28 2018;4(6):798-804.

1  
2  
3  
4  
5  
6  
7  
8  
9  
10  
11  
12  
13  
14  
15  
16  
17  
18  
19  
20  
21  
22  
23  
24  
25  
26  
27  
28  
29  
30  
31  
32  
33  
34  
35  
36  
37  
38  
39  
40  
41  
42  
43  
44  
45  
46

For peer review only



1  
2  
3  
4  
5  
6  
7  
8  
9  
10  
11  
12  
13  
14  
15  
16  
17  
18  
19  
20  
21  
22  
23  
24  
25  
26  
27  
28  
29  
30  
31  
32  
33  
34  
35  
36  
37  
38  
39  
40  
41  
42  
43  
44  
45  
46

Figure 1. Relations among categories according to time, which changes the weight of the barriers and facilitators of exercise

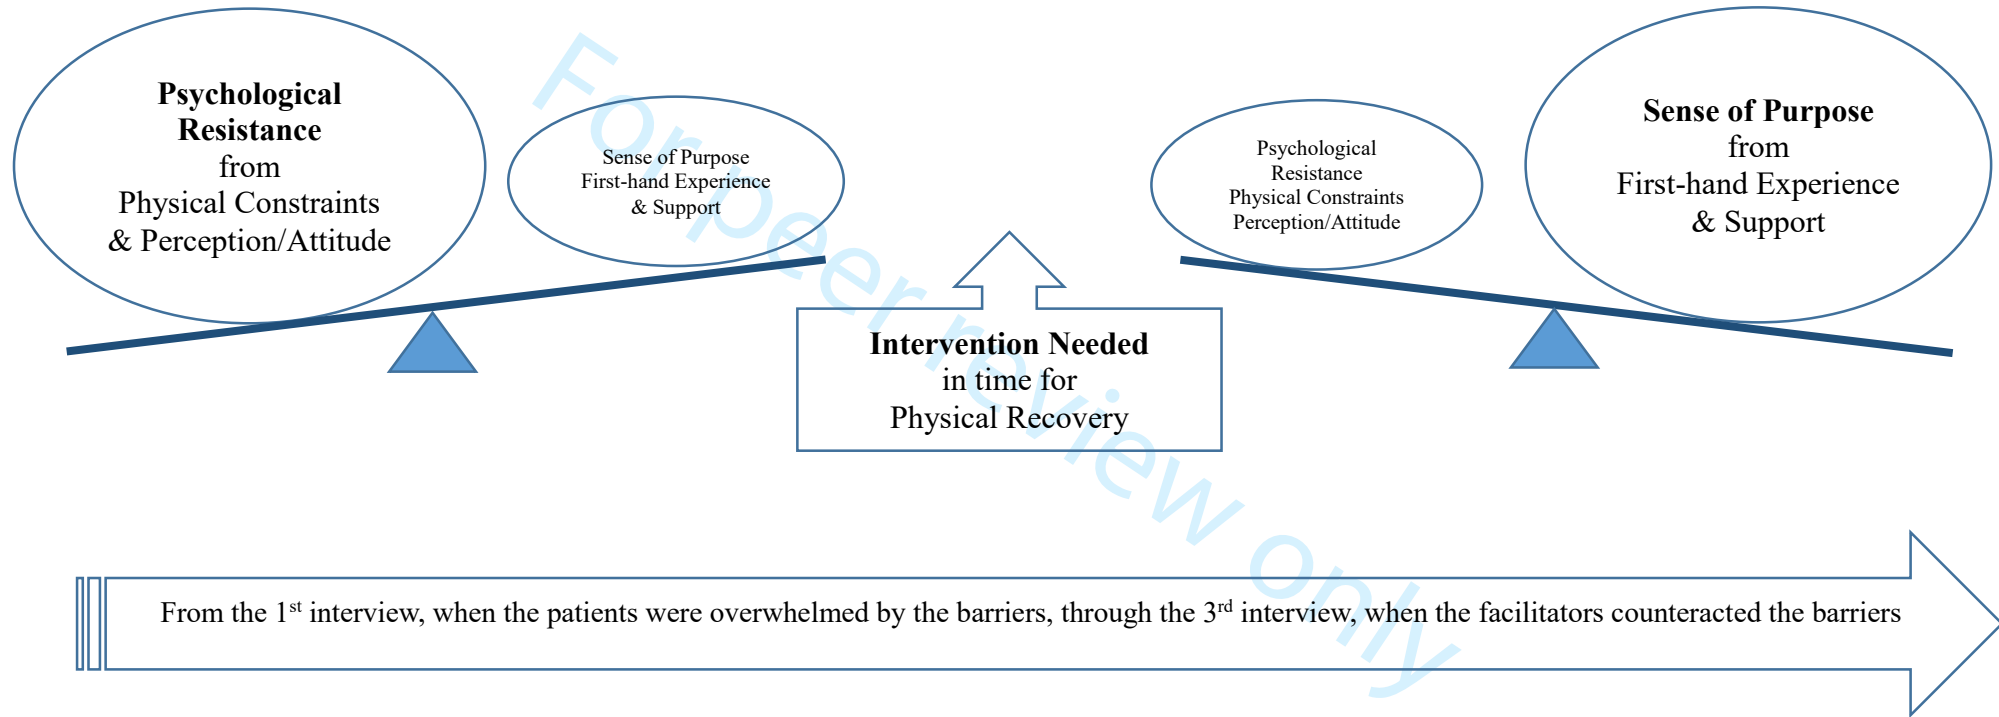

## COREQ (COnsolidated criteria for REporting Qualitative research) Checklist

A checklist of items that should be included in reports of qualitative research. You must report the page number in your manuscript where you consider each of the items listed in this checklist. If you have not included this information, either revise your manuscript accordingly before submitting or note N/A

| Topic                                          | Item No. | Guide Questions/Description                                                                                                                                 | Reported on Page No. |
|------------------------------------------------|----------|-------------------------------------------------------------------------------------------------------------------------------------------------------------|----------------------|
| <b>Domain 1: Research team and reflexivity</b> |          |                                                                                                                                                             |                      |
| <i>Personal characteristics</i>                |          |                                                                                                                                                             |                      |
| Interviewer/facilitator                        | 1        | Which author/s conducted the interview or focus group?                                                                                                      | 7                    |
| Credentials                                    | 2        | What were the researcher's credentials?<br>e.g. PhD, MD                                                                                                     | 1                    |
| Occupation                                     | 3        | What was their occupation at the time of the study?                                                                                                         | 7                    |
| Gender                                         | 4        | Was the researcher male or female?                                                                                                                          | -                    |
| Experience and training                        | 5        | What experience or training did the researcher have?                                                                                                        | 7                    |
| <i>Relationship with participants</i>          |          |                                                                                                                                                             |                      |
| Relationship established                       | 6        | Was a relationship established prior to study commencement?                                                                                                 | 5                    |
| Participant knowledge of the interviewer       | 7        | What did the participants know about the researcher?<br>e.g. personal goals, reasons for doing the research                                                 | --                   |
| Interviewer characteristics                    | 8        | What characteristics were reported about the interviewer/facilitator?<br>e.g. Bias, assumptions, reasons and interests in the research topic                | 7                    |
| <b>Domain 2: Study design</b>                  |          |                                                                                                                                                             |                      |
| <i>Theoretical framework</i>                   |          |                                                                                                                                                             |                      |
| Methodological orientation and Theory          | 9        | What methodological orientation was stated to underpin the study?<br>e.g. grounded theory, discourse analysis, ethnography, phenomenology, content analysis | 8                    |
| <i>Participant selection</i>                   |          |                                                                                                                                                             |                      |
| Sampling                                       | 10       | How were participants selected?<br>e.g. purposive, convenience, consecutive, snowball                                                                       | 5                    |
| Method of approach                             | 11       | How were participants approached?<br>e.g. face-to-face, telephone, mail, email                                                                              | 5                    |
| Sample size                                    | 12       | How many participants were in the study?                                                                                                                    | 5                    |
| Non-participation                              | 13       | How many people refused to participate or dropped out?<br>Reasons?                                                                                          | 5                    |
| <i>Setting</i>                                 |          |                                                                                                                                                             |                      |
| Setting of data collection                     | 14       | Where was the data collected?<br>e.g. home, clinic, workplace                                                                                               | 6                    |
| Presence of non-participants                   | 15       | Was anyone else present besides the participants and researchers?                                                                                           | 6                    |
| Description of sample                          | 16       | What are the important characteristics of the sample?<br>e.g. demographic data, date                                                                        | Table2               |

| Topic                                  | Item No. | Guide Questions/Description                                                                                                     | Reported on Page No. |
|----------------------------------------|----------|---------------------------------------------------------------------------------------------------------------------------------|----------------------|
| <i>Data collection</i>                 |          |                                                                                                                                 |                      |
| Interview guide                        | 17       | Were questions, prompts, guides provided by the authors? Was it pilot tested?                                                   | Table 1              |
| Repeat interviews                      | 18       | Were repeat interviews carried out? If yes, how many?                                                                           | 6                    |
| Audio/visual recording                 | 19       | Did the research use audio or visual recording to collect the data?                                                             | 6                    |
| Field notes                            | 20       | Were field notes made during and/or after the interview or focus group?                                                         | 6                    |
| Duration                               | 21       | What was the duration of the interviews or focus group?                                                                         | 6                    |
| Data saturation                        | 22       | Was data saturation discussed?                                                                                                  | 5                    |
| Transcripts returned                   | 23       | Were transcripts returned to participants for comment and/or correction?                                                        | 7-8                  |
| <b>Domain 3: analysis and findings</b> |          |                                                                                                                                 |                      |
| <i>Data analysis</i>                   |          |                                                                                                                                 |                      |
| Number of data coders                  | 24       | How many data coders coded the data?                                                                                            | 8                    |
| Description of the coding tree         | 25       | Did authors provide a description of the coding tree?                                                                           | Table 3              |
| Derivation of themes                   | 26       | Were themes identified in advance or derived from the data?                                                                     | 8                    |
| Software                               | 27       | What software, if applicable, was used to manage the data?                                                                      | N/A                  |
| Participant checking                   | 28       | Did participants provide feedback on the findings?                                                                              | 7-8                  |
| <i>Reporting</i>                       |          |                                                                                                                                 |                      |
| Quotations presented                   | 29       | Were participant quotations presented to illustrate the themes/findings? Was each quotation identified? e.g. participant number | 12-15                |
| Data and findings consistent           | 30       | Was there consistency between the data presented and the findings?                                                              | 8-15                 |
| Clarity of major themes                | 31       | Were major themes clearly presented in the findings?                                                                            | 8-15<br>Table 3      |
| Clarity of minor themes                | 32       | Is there a description of diverse cases or discussion of minor themes?                                                          | 15-16<br>Table 3     |

Developed from: Tong A, Sainsbury P, Craig J. Consolidated criteria for reporting qualitative research (COREQ): a 32 item checklist for interviews and focus groups. *International Journal for Quality in Health Care*. 2007. Volume 19, Number 6: pp. 349–35

# BMJ Open

## Tearing down the barriers of exercise after mastectomy: A qualitative inquiry to facilitate exercise among breast cancer survivors

|                                 |                                                                                                                                                                                                                                                                                                                                                                                                                                                                                                                                                                                                                                                                                                                                                                                                                                                                                                                           |
|---------------------------------|---------------------------------------------------------------------------------------------------------------------------------------------------------------------------------------------------------------------------------------------------------------------------------------------------------------------------------------------------------------------------------------------------------------------------------------------------------------------------------------------------------------------------------------------------------------------------------------------------------------------------------------------------------------------------------------------------------------------------------------------------------------------------------------------------------------------------------------------------------------------------------------------------------------------------|
| Journal:                        | <i>BMJ Open</i>                                                                                                                                                                                                                                                                                                                                                                                                                                                                                                                                                                                                                                                                                                                                                                                                                                                                                                           |
| Manuscript ID                   | bmjopen-2021-055157.R1                                                                                                                                                                                                                                                                                                                                                                                                                                                                                                                                                                                                                                                                                                                                                                                                                                                                                                    |
| Article Type:                   | Original research                                                                                                                                                                                                                                                                                                                                                                                                                                                                                                                                                                                                                                                                                                                                                                                                                                                                                                         |
| Date Submitted by the Author:   | 02-May-2022                                                                                                                                                                                                                                                                                                                                                                                                                                                                                                                                                                                                                                                                                                                                                                                                                                                                                                               |
| Complete List of Authors:       | Yeon, Sujin; Yonsei University, Department of Sport Industry Studies<br>Jeong, Ansuk; Yonsei University, Institute of Convergence Science<br>Min, Jihee; Yonsei University, Department of Sport Industry Studies<br>Byeon, Jiyong; Yonsei University, Department of Sport Industry Studies<br>Yoon, Yong Jin; Yonsei University, Department of Sport Industry Studies<br>Heo, Jinmoo; Yonsei University, Department of Sport Industry Studies<br>Lee, Chulwon; Yonsei University, Department of Sport Industry Studies<br>Kim, Jeeeye; Yonsei University College of Medicine, Department of Surgery<br>Park, Seho; Yonsei University College of Medicine, Department of Surgery<br>Kim, Seung Il; Yonsei University College of Medicine, Department of Surgery<br>Jeon, Justin ; Yonsei University, Department of Sport Industry Studies;<br>Yonsei University, Exercise Medicine Center for Diabetes and Cancer Patients |
| <b>Primary Subject Heading</b>: | Sports and exercise medicine                                                                                                                                                                                                                                                                                                                                                                                                                                                                                                                                                                                                                                                                                                                                                                                                                                                                                              |
| Secondary Subject Heading:      | Mental health, Qualitative research, Rehabilitation medicine                                                                                                                                                                                                                                                                                                                                                                                                                                                                                                                                                                                                                                                                                                                                                                                                                                                              |
| Keywords:                       | SPORTS MEDICINE, MENTAL HEALTH, ONCOLOGY, Breast surgery < SURGERY, QUALITATIVE RESEARCH                                                                                                                                                                                                                                                                                                                                                                                                                                                                                                                                                                                                                                                                                                                                                                                                                                  |
|                                 |                                                                                                                                                                                                                                                                                                                                                                                                                                                                                                                                                                                                                                                                                                                                                                                                                                                                                                                           |

SCHOLARONE™  
Manuscripts



I, the Submitting Author has the right to grant and does grant on behalf of all authors of the Work (as defined in the below author licence), an exclusive licence and/or a non-exclusive licence for contributions from authors who are: i) UK Crown employees; ii) where BMJ has agreed a CC-BY licence shall apply, and/or iii) in accordance with the terms applicable for US Federal Government officers or employees acting as part of their official duties; on a worldwide, perpetual, irrevocable, royalty-free basis to BMJ Publishing Group Ltd ("BMJ") its licensees and where the relevant Journal is co-owned by BMJ to the co-owners of the Journal, to publish the Work in this journal and any other BMJ products and to exploit all rights, as set out in our [licence](#).

The Submitting Author accepts and understands that any supply made under these terms is made by BMJ to the Submitting Author unless you are acting as an employee on behalf of your employer or a postgraduate student of an affiliated institution which is paying any applicable article publishing charge ("APC") for Open Access articles. Where the Submitting Author wishes to make the Work available on an Open Access basis (and intends to pay the relevant APC), the terms of reuse of such Open Access shall be governed by a Creative Commons licence – details of these licences and which [Creative Commons](#) licence will apply to this Work are set out in our licence referred to above.

Other than as permitted in any relevant BMJ Author's Self Archiving Policies, I confirm this Work has not been accepted for publication elsewhere, is not being considered for publication elsewhere and does not duplicate material already published. I confirm all authors consent to publication of this Work and authorise the granting of this licence.

1  
2  
3  
4 Tearing down the barriers of exercise after mastectomy: A qualitative inquiry to facilitate  
5  
6 exercise among breast cancer survivors  
7  
8  
9  
10  
11  
12

13 Sujin Yeon<sup>1\*</sup>, Ansuk Jeong<sup>2\*</sup>, Jihee Min<sup>1</sup>, Jiyong Byeon<sup>1</sup>, Yong Jin Yoon<sup>1</sup>, Jinmoo Heo<sup>1</sup>,  
14  
15 Chulwon Lee<sup>1</sup>, Jeeye Kim<sup>3</sup>, Seho Park<sup>3</sup>, Seungil Kim<sup>3</sup>, & Justin Y. Jeon<sup>1,2, 4,5†</sup>  
16  
17  
18  
19

20 <sup>1</sup> Department of Sport Industry Studies, Exercise Medicine and Rehabilitation Laboratory,  
21 Yonsei University, Seoul, Korea; <sup>2</sup> Institute of Convergence Science, Yonsei University,  
22 Seoul, Korea; <sup>3</sup> Division of Breast Surgery, Department of Surgery, Yonsei University  
23 College of Medicine, Seoul, Korea; <sup>4</sup> Exercise Medicine Center for Diabetes and Cancer  
24 Patients, Yonsei University, Seoul, Korea; <sup>5</sup> Cancer Prevention Center, Yonsei Cancer  
25 Center, Shinchon Severance Hospital, Seoul, Korea  
26  
27  
28  
29  
30  
31  
32  
33  
34  
35  
36  
37  
38  
39  
40  
41  
42  
43  
44  
45  
46  
47  
48  
49  
50  
51  
52  
53  
54  
55

56 All the authors have no conflict of interest to declare.  
57  
58  
59  
60

\* These authors equally contributed to this work as first author.

† Correspondence should be addressed to: Justin Y. Jeon; Department of Sport Industry  
Studies, Yonsei University, 50 Shinchon-ro, Seoul, South Korea, 03722; [jjeon@yonsei.ac.kr](mailto:jjeon@yonsei.ac.kr);  
Seungil Kim, Department of Surgery, Yonsei University College of Medicine, 50 Yonsei-ro,  
Seodaemun-gu, Seoul 120-752, Republic of Korea, [skim@yuhs.ac](mailto:skim@yuhs.ac)

Word Count: 3105

## Abstract

*Objective.* Proper exercise immediately after breast cancer surgery (BCS) may prevent unnecessary physical and psychological decline resulting from surgery; however, patients' attitude, barriers, and facilitators for exercise during this period have not been studied. Hence, the current study explored the barriers and facilitators of exercise among breast cancer patients through multiple interviews immediately after surgery through 4 weeks after BCS.

*Methods.* We conducted three in-depth interviews of 33 breast cancer patients within one month after BCS.

*Results.* We identified 44 themes, 10 codes, and 5 categories from interview results. Physical constraints and psychological resistance were identified as the barriers of exercise, while a sense of purpose and first-hand exercise experience were identified as the facilitators of exercise. By conducting the interviews over the course of 4 weeks after surgery, we monitored patterns of changes in barriers and facilitators over time. Overall, our analyses identified that professional intervention based on the time since surgery and the physical state after BCS is essential. The intervention would counteract the overwhelming psychological resistance in the early weeks by developing a sense of purpose in the later weeks.

*Conclusions.* We made suggestions for future research and exercise intervention programs that can benefit breast cancer survivors based on the categories, codes, and themes identified in the current study.

**Keywords:** barriers to exercise; breast cancer; cancer survivors; exercise intervention; exercise promotion; facilitators of exercise; professional support

## Strengths and Limitations

- The participants were recruited immediately after the breast cancer surgery and shared their experiences regarding multiple factors.

- To examine the effect of time, multiple interviews were conducted from immediately after surgery up to one month after surgery.
- This study was conducted at the tertiary hospital in South Korea and generalization of the findings from the current study to other regions and countries should be made careful.

For peer review only



## BACKGROUND

The incidence of breast cancer has been continually increasing. Currently, breast cancer is the most common cancer among women, accounting for 24.2% of the cases worldwide and 20.3% of the cases in South Korea.<sup>1</sup> Although the 5-year survival rate of breast cancer is over 90 % for Stage 0-2 breast cancer patients in South Korea, a substantial number of breast cancer patients experience breast cancer recurrence and suffer heavily from side effects of cancer treatments.<sup>2</sup> Although the rate of breast-conserving surgery has increased from 37.6% in 2002 to 67.4% in 2017, many breast cancer patients develop both short-term and long-term physical impairments such as lymphedema, decreased shoulder strength, and range of motion (ROM).<sup>3-6</sup> In addition to physical impairment, the prevalence of depression, distress, anger, and social isolation is high among breast cancer survivors.<sup>7</sup>

Exercise and physical activity (PA) improve the prognosis of breast cancer (e.g., decrease breast cancer-specific and all-cause mortality).<sup>8</sup> The benefit of exercise among breast cancer patients is not limited to improvement in survival. Early implementation of exercises has been shown to reduce surgery-related complications,<sup>9</sup> pain,<sup>10</sup> and risk of lymphedema<sup>11</sup>. Exercises such as shoulder ROM exercise and isometric and passive stretching shortly after surgery could improve shoulder ROM during early recovery after surgery.<sup>12</sup>

Although ample evidence exists on the benefits of exercise on recovery after breast cancer surgery (BCS),<sup>13</sup> breast cancer patients are reluctant to participate in exercise during early recovery. Furthermore, few studies have investigated the attitude toward exercise and exercise experience, barriers, and facilitators over an extended period of time, particularly immediately after BCS until 4 weeks after surgery. A few qualitative studies have investigated these factors in cancer survivors after a few months of surgery<sup>14-16</sup>. Considering the various different needs of the breast cancer survivors depending on the time post-surgery, more information on the barriers and facilitators of exercise immediately after BCS can potentially

1  
2  
3  
4 be useful in tailoring exercise intervention programs to the specific needs of breast cancer  
5  
6 survivors.  
7

8  
9 In these regards, the current study investigated the factors related to exercise promotion  
10 within one month after BCS. More specifically, by employing the in-depth interview method,  
11 the study investigated: (1) the barriers and the facilitators of exercise for breast cancer survivors;  
12  
13 (2) the changes in these factors according to time after BCS. Additionally, the current study  
14  
15 aimed to complement the intentions expressed in the interviews with the actual behaviors based  
16  
17 on the quantitative data on PA.  
18  
19  
20  
21

## 22 **METHODS**

### 23 **Participants**

24  
25 We recruited 33 women who underwent BCS at the breast cancer center of a university  
26  
27 medical center in Seoul, Korea, between February 14, 2019 and November 12, 2019, using the  
28  
29 criterion sampling technique.<sup>17</sup> Patients who were over 70 years old, had undergone bilateral  
30  
31 or reconstruction surgery, or had a history of previous cancer were excluded. The recruitment  
32  
33 of new participants was stopped when new data from additional participants did not add new  
34  
35 ideas or concepts related to the purpose of the study.<sup>18</sup>  
36  
37  
38  
39  
40

### 41 **Ethics Approval Statement**

42  
43 This study was approved by the Institutional Review Board of the hospital (IRB No.  
44  
45 4-2018-1094). All participants provided written informed consent and agreed to be interviewed  
46  
47 multiple times within one month after BCS.  
48  
49

### 50 **Patient and Public Involvement**

51  
52 From previous experiences with people who underwent BCS, the research team  
53  
54 developed the research question and aimed to make relevant contributions to their real lives.  
55  
56 Because of the lack of literature studying patients immediately after BCS, however, the team  
57  
58 decided to employ qualitative approach to understand the patients' experience.  
59  
60

Potential participants who met all the inclusion criteria were contacted by the physician to explain the research participation opportunity. Patients who agreed to participate in multiple interviews after BCS signed the informed consent. The same procedure was repeated until the saturation point.<sup>17</sup> Three of 36 participants withdrew (one patient dropped out because of re-surgery and the other two refused to participate); thus, 33 patients participated in the current study.

The research participants met with the first author of the current study one day before BCS, to build a collaborative relationship between the researcher and the participant. After BCS, the interview was conducted three times during clinic visits: first interview within two weeks after surgery; second interview between two and three weeks after surgery; and third interview between three weeks and one month after surgery. All interviews were conducted one-on-one in Korean. With the participants' permission, the interviews were audio-recorded and transcribed verbatim, with two different semi-structured interview questionnaires (Table 1). Only after all the three interviews were completed, a professional exercise consultation was provided as a compensation for research participation, not as a component of this study.

Table 1. Interview questionnaires

| Interview   | Questions                                                                                                                                                                                                                                                                                                                                                                                                                                                                                      |
|-------------|------------------------------------------------------------------------------------------------------------------------------------------------------------------------------------------------------------------------------------------------------------------------------------------------------------------------------------------------------------------------------------------------------------------------------------------------------------------------------------------------|
| 1st         | <ul style="list-style-type: none"> <li>• How is the surgery site?</li> <li>• Are there any functional changes in your arm?</li> <li>• Are there any changes in your daily-living activities such as doing chores, putting clothes on, and washing dishes?</li> <li>• Did you exercise during the past week (after surgery)?               <ul style="list-style-type: none"> <li>• If yes, how often? Why did you exercise?</li> <li>• If no, why did you not exercise?</li> </ul> </li> </ul> |
| 2nd and 3rd | <ul style="list-style-type: none"> <li>• Compared to the last week, is there any change at the surgery site?</li> <li>• Compared to the last week, are there any changes in your activities of daily living?</li> <li>• Did you exercise during the past week (after surgery)?               <ul style="list-style-type: none"> <li>• If yes, how often? Why did you exercise?</li> <li>• If no, why did you not exercise?</li> </ul> </li> </ul>                                              |

- 
- 3rd
- Could you specify the biggest barriers and facilitators of exercise for the past month?
  - Would you like say anything to other breast cancer survivors?
- 

The complementary measurement of the participants' PA level was performed during each interview using the Global PA Questionnaire (GPAQ), developed by the World Health Organization (WHO).<sup>19</sup> The GPAQ comprises 16 items in four domains of PA: work, leisure time, transportation, and sedentary behavior. The reliability and validity of the Korean version of the GPAQ were examined in a previous study.<sup>20</sup> We added a measure of walking and its frequency and duration, which is not included in the original GPAQ but is relevant to the current study.

### **Trustworthiness**

To increase the trustworthiness of data,<sup>21</sup> we have employed three different methods: reflective note, observation, and member check. After each interview, the exercise specialist reflected on their performance as an interviewer. Mistakes and important lessons learnt were recorded in a reflective note, and methods to improve the quality of future interviews were practiced before the next interview. A sufficient amount of time was spent observing participants' physical performance and symptoms including: shoulder ROM, strength, pain, and other medical treatment. To increase the reliability of the findings, interviews were conducted three times over four weeks as participants underwent treatment. The transcript and summary of each interview were confirmed by the participants to ensure the transcriptions and summaries correctly reflected what they intended to express.

### **Analysis**

Guided by the Grounded Theory,<sup>22</sup> the team started with open coding, identifying the themes that emerged from the transcripts. In addition, the field notes were included in the analysis to avoid loss of non-verbal information. Immediately after the team agreed on the first

group of themes collectively, the authors worked on the subsequent transcripts individually. The team conducted regular meetings and worked on abstracting the codes and then the categories to proceed to the selective coding collectively. During the constant comparative analysis, member checking was performed to increase the validity of the analysis. The analysis results were sent to three randomly selected interviewees to confirm the meaning and nuance of answers, and thereby, their experience as breast cancer survivors.

Complementary quantitative data analysis was performed using a repeated measures analysis of variance to compare the means of total PA total and walk, before surgery and during the first, second, and third interview. To determine whether total PA and walk time is different from baseline presurgery levels, paired t-test was used.

## RESULTS

### Participant Description

The characteristics of the 33 participants are presented in Table 2. Characteristics such as age, weight, surgery type, cancer stage, dominant arm, operation side, post-operative day (POD, from 1 through 30 days), and whether they had neo-adjuvant chemotherapy were analyzed.

Table 2. Characteristics of the participants

| ID | Age Range (years) | Type of Surgery | Cancer Stage |
|----|-------------------|-----------------|--------------|
| 1  | 60-64             | TM/SLNB         | 1A           |
| 2  | 55-59             | TM/SLNB         | 0            |
| 3  | 50-54             | TM/SLNB         | 2A           |
| 4  | 35-39             | TM/ALND         | 3A           |
| 5  | 55-59             | TM/ALND         | 1A           |
| 6  | 55-59             | TM/ALND         | 2B           |
| 7  | 65-69             | PM/SLNB         | 1A           |
| 8  | 50-54             | PM/SLNB         | 1A           |
| 9  | 40-44             | PM/SLNB         | 1A           |
| 10 | 45-49             | PM/ALND         | 2A           |

|    |    |       |         |    |
|----|----|-------|---------|----|
| 1  |    |       |         |    |
| 2  |    |       |         |    |
| 3  |    |       |         |    |
| 4  | 11 | 50-54 | PM/ALND | 1A |
| 5  | 12 | 55-59 | PM/ALND | 0  |
| 6  | 13 | 60-64 | PM/SLNB | 0  |
| 7  | 14 | 65-69 | PM/SLNB | 1A |
| 8  | 15 | 60-64 | PM/SLNB | 1A |
| 9  | 16 | 45-49 | PM/SLNB | 1A |
| 10 | 17 | 35-39 | PM/SLNB | 0  |
| 11 | 18 | 60-64 | PM/SLNB | 1A |
| 12 | 19 | 60-64 | PM/ALND | 1B |
| 13 | 20 | 55-59 | TM/SLNB | 1A |
| 14 | 21 | 65-69 | TM/SLNB | 1A |
| 15 | 22 | 50-54 | TM/SLNB | 1A |
| 16 | 23 | 65-69 | TM/SLNB | 0  |
| 17 | 24 | 60-64 | TM/SLNB | 1A |
| 18 | 25 | 40-44 | TM/SLNB | 0  |
| 19 | 26 | 60-64 | TM/ALND | 1A |
| 20 | 27 | 65-69 | TM/SLNB | 1A |
| 21 | 28 | 50-54 | PM/ALND | 2A |
| 22 | 29 | 60-64 | PM/ALND | 3A |
| 23 | 30 | 55-59 | TM/SLNB | 1A |
| 24 | 31 | 55-59 | TM/ALND | 2B |
| 25 | 32 | 35-39 | PM/ALND | 2A |
| 26 | 33 | 40-44 | PM/SLNB | 1A |

ALND, axillary lymph node dissection; N, No; PM, partial mastectomy; POD, post-operative day; SLNB, sentinel lymph node biopsy; TM, total mastectomy; Y, Yes.

### ***Intervention Needed in Time for Physical Recovery***

The interviewees identified multiple factors that either facilitated participants to exercise more or hindered them from exercising after BCS. Out of the 44 themes that emerged from the interviews, 10 codes and 5 categories were identified (Table 3). Physical constraints and psychological resistance were identified as the barriers for exercise, whereas the sense of purpose and first-hand exercise experience were identified as the facilitators for exercise during the early stage of rehabilitation after BCS. The overwhelming physical constraints that produced psychological resistance in the earlier weeks after surgery appeared to be gradually substituted by the sense of purpose that derived from the first-hand experience encouraged by diverse sources. This conclusion is consistent with the PA data: the motivation to perform exercise and PA materialized with time (Table 4). Quantitative data of 31 participants were collected and analyzed with repeated measure analysis of variance, which revealed that the

total PA level statistically significantly increased over time ( $F = 3.64, p < .05$ ). The supportive intervention that reflects an individual patient's physical condition can expedite the substitution process, if conducted properly. Our analyses revealed the core variable that answered our research questions was "*intervention needed in time for physical recovery*" to meet the varying needs of the survivors according to the time after BCS (Figure 1).

Table 3. Themes, codes, and categories from the interviews

| Categories                              | Codes                                          | Themes                                                                                 |
|-----------------------------------------|------------------------------------------------|----------------------------------------------------------------------------------------|
| Physical constraints                    | Postoperative syndrome                         | Lymphedema, seroma                                                                     |
|                                         |                                                | Pain                                                                                   |
|                                         | Operation-derived condition                    | Limited mobility of the arm                                                            |
|                                         |                                                | Feeling weak                                                                           |
| Non-operation-derived condition         | Drain                                          |                                                                                        |
|                                         | Neoadjuvant therapy                            |                                                                                        |
| Pre-existing physical condition         |                                                |                                                                                        |
|                                         |                                                |                                                                                        |
| Psychological resistance                | Perception and attitude                        | Believing that daily living activities are sufficient                                  |
|                                         |                                                | Unaware of the requirement of exercise                                                 |
|                                         |                                                | Exercise not prioritized                                                               |
|                                         |                                                | Not wanting to burden the body                                                         |
|                                         |                                                | Lack of self-efficacy regarding exercise                                               |
|                                         | Concerns from the lack of accurate information | Psychological withdrawal                                                               |
|                                         |                                                | Concerns regarding the potential side-effects of exercise                              |
|                                         |                                                | Concerns regarding injuries                                                            |
|                                         |                                                | Concerns regarding the timing being inappropriate                                      |
|                                         |                                                | Concerns regarding the etiology and symptoms of the cancer – related to exercise       |
| Sense of purpose                        | Encouragement and support                      | Own theory regarding the etiology and the symptoms of the cancer – related to exercise |
|                                         |                                                |                                                                                        |
|                                         |                                                |                                                                                        |
|                                         |                                                |                                                                                        |
|                                         |                                                |                                                                                        |
|                                         | Expected benefits                              | From family                                                                            |
|                                         |                                                | From medical professionals                                                             |
|                                         |                                                | From exercise therapists                                                               |
|                                         |                                                | From other cancer patients                                                             |
|                                         |                                                | From media                                                                             |
| Speed up the recovery                   |                                                |                                                                                        |
| Recover from the postoperative syndrome |                                                |                                                                                        |
| Health management                       |                                                |                                                                                        |

|                       |                                    |                                                                 |
|-----------------------|------------------------------------|-----------------------------------------------------------------|
|                       |                                    | Muscular strength                                               |
|                       |                                    | Increase muscle mass                                            |
|                       |                                    | Improve flexibility                                             |
|                       |                                    | Prevent relapse by promoting health                             |
|                       |                                    | General physical health                                         |
|                       |                                    | Break unhealthy lifestyle                                       |
|                       |                                    | Prevent weight gain                                             |
|                       |                                    | Maintain healthy lifestyle                                      |
| First-hand experience | Benefits of exercise               | Reduced pain                                                    |
|                       |                                    | Promoted flexibility                                            |
|                       |                                    | Increased amount of exercise                                    |
|                       |                                    | Increased physical activities                                   |
|                       |                                    | Reduced discomforts                                             |
|                       |                                    | Expedited recovery                                              |
|                       | Heightened sense of purpose        | Attribution of cancer to the lack of exercise                   |
|                       |                                    | Want to exercise more                                           |
| Intervention needed   | Accurate information and education | Want consultation regarding symptoms                            |
|                       |                                    | Want information/education in accordance with the proper timing |

Table 4. The change of physical activity level (pre-surgery to 4 weeks post-surgery)

|                        | Before surgery<br><i>M (SD)</i> | 1 <sup>st</sup> interview<br><i>M (SD)</i> | 2 <sup>nd</sup> interview<br><i>M (SD)</i> | 3 <sup>rd</sup> interview<br><i>M (SD)</i> | <i>p</i> for time |
|------------------------|---------------------------------|--------------------------------------------|--------------------------------------------|--------------------------------------------|-------------------|
| VPA<br>(min/week)      | 0                               | 0                                          | 0                                          | 0                                          | N/A               |
| MPA<br>(min/week)      | 41.0 (113.4)                    | 0                                          | 0                                          | 12.3 (54.1)                                | 0.07              |
| Total PA<br>(min/week) | 142.6 (167.6)                   | 49.8 (61.6)*                               | 96.1 (175.4)                               | 142.6 (161.9)                              | 0.02              |
| Walk<br>(min/week)     | 204.4 (208.0)                   | 142.1 (165.3)                              | 173.1 (139.1)                              | 222.9 (166.4)                              | 0.1               |

Total physical activity = (minutes of MVPA at week) + (minutes of leisure-time MVPA) + (minutes of transportation PA), Abbreviation: M (SD), mean (standard deviation); PA, physical activity; VPA, vigorous physical activity, MPA moderate physical activity. \**p* value < 0.05 versus baseline Total PA



## Barriers to Exercise

*Physical Constraints.* Breast cancer patients who underwent surgery experienced multiple types of physical restraints, which made it difficult for them to participate in or even think about exercise. The most frequently reported barrier to exercise was pain, followed by limited shoulder ROM, and frequent by-products of the treatment including seroma and the drain attached to the body. All these contributed to a perception of weakness throughout the body, especially among those who received neo-adjuvant chemotherapy.

*“I couldn’t exercise after the surgery. I am not eating well and do not feel strong. It’s not just my arm that feels weak; my whole body feels weak. I lay inert or just sat leaning on something, most of the time.”* (Participant #19, PM/ALND, first interview)

*“(After the drain was removed) This (seroma) started leaking and I felt so distressed. It stressed me out. Only a few drops, you know, when it leaks, are enough to feel so awkward. Thinking about it, I couldn’t exercise. This past week was more uncomfortable.”* (Participant #19, PM/ALND, third interview)

*Psychological Resistance.* These physical constraints discouraged participants from exercising because they believed that “physical activities may be harmful or at least drain their energy.” Moreover, although their physical condition permitted exercise, participants did not feel enough motivation to exercise. In some cases, anxiety regarding possible injuries overcame their wish to become more physically active. Other times, they excused themselves from doing more exercise as “daily living and house chores are good enough exercise.” In addition to these concerns and excuses, their pre-existing perception of the inefficacy of exercise appeared to discourage them from exercising after surgery.

*“Well, I didn’t do much. I couldn’t exercise at all because of the pain. The armpit feels tight and poking. What if moving causes more pain? Worried about it,*

1  
2  
3  
4 *I can't exercise..*" (Participant #27, TM/SLNB, third interview)  
5

6 *"I couldn't exercise... Well, I thought of looking over the booklet (of exercise*  
7 *education), but didn't. I don't recall why I didn't, but time passed while I was*  
8 *taking care of my grandkids. I put it on the dining table and didn't reach for it*  
9 *later. I did try stretching my arm lying down on the bed. It wasn't painful though."*  
10  
11  
12  
13  
14

15 (Participant #13, PM/SLNB, first interview)  
16

17  
18 Notwithstanding, the lack of accurate information was identified as a significant  
19 reason for the patients not take courage to exercise. After surgery, considering all the  
20 byproducts of operation, whether anticipated or unanticipated, patients' anxiety was not  
21 ungrounded. Accurate information regarding the types of activities and exercises that speed  
22 up the recovery from diverse postoperative symptoms was important.  
23  
24  
25  
26  
27  
28

29 *"Well, I can't find the information I need.. when should I work on muscles,*  
30 *when can I jog or run.. I don't know.."* (Participant #33, PM/SLNB, first  
31 interview)  
32  
33  
34  
35

36 Often, different health professionals such as surgeons, medical oncologists,  
37 physiatrists, and plastic surgeon (in case patients underwent breast reconstruction) provided  
38 varying information on when and how to exercise. Lack of information or inconsistent  
39 information was the barrier to exercise for breast cancer patients.  
40  
41  
42  
43  
44

#### 45 **Facilitators of Exercise**

46

47  
48 *Accurate Information.* Accurate information on exercise according to the time after  
49 surgery was identified as the key facilitator to promote exercise among patients. The patients  
50 expressed their wish to have some professional consultation regarding exercise interventions  
51 that take their symptoms and health conditions into account.  
52  
53  
54  
55

56  
57 *Encouragement and Support.* In the process of recovery after BCS, patients reported  
58 social support as an important factor that motivated them to exercise more. Diverse sources  
59  
60

1  
2  
3  
4 worked, including medical professionals, exercise therapists, friends, family members, as  
5  
6 well as fellow cancer patients.  
7

8  
9 *“(Other patients in this rehab center says) You have to exercise. Otherwise,*  
10 *it’ll become stiff. Those who have experienced something like myself informed me*  
11 *to do this and that, even regarding how to wash up. It’s a great help from these*  
12 *folks who have been or are going through the similar experiences (treatment*  
13 *processes).. It’s good.”* (Participant #28, PM/ALND, third interview)  
14  
15  
16  
17  
18  
19

20 *First-hand Experience.* The participants reported their first-hand experience as an  
21 important motivator for exercise. They increased the activity level and exercised more after  
22 knowing the positive effects of exercise through experience.  
23  
24  
25

26  
27 *“The more I exercise, the larger this angle becomes. It was really hard to*  
28 *follow the instructions when I wasn’t working out. The more I tried, however, the*  
29 *easier it became. So I realized the importance (of exercise). If I do not exercise, it*  
30 *will be harder. So whenever it pops up in my mind, I try to do some exercise. Even*  
31 *in waking up, I tried to do some arm stretching.”* (Participant #24, TS/SLNB,  
32  
33  
34  
35  
36  
37  
38  
39 second interview)  
40

41 *Sense of Purpose.* All the aforementioned factors contributed to the patients’ sense of  
42 purpose, expecting the benefits of exercise. The expectation included pain reduction, fast  
43 recovery, relapse prevention, and health management. The patients who had mastectomy tried  
44 to motivate themselves to exercise more. In addition, they frequently expressed their wish to  
45 increase physical strength, muscle mass, and flexibility, as well as to maintain a healthy  
46  
47  
48  
49  
50  
51  
52  
53  
54 lifestyle.

55 *“(People say) It takes 3 months to recover from the surgery, but recovery is up*  
56 *to me, I figure. Exercising and building muscles are up to me. So I do exercise.”*  
57  
58  
59  
60 (Participants #2, TM/SLNB, third interview)

1  
2  
3  
4 *“I think I got cancer because I had not exercised... There’s no other reason.*  
5  
6 *You know, there’s no known cause for the triple negative breast cancer.. I guess*  
7  
8 *it’s from me not exercising... So I do exercise now, do walking at least.”*  
9

10  
11 (Participant #9, PM /SLNB, second interview)  
12

### 13 **Impact of Timing**

14  
15  
16 During the current study, the participants showed a certain pattern related to the time  
17  
18 after BCS. Diverse factors contributed to the heightened psychological resistance, resulting in  
19  
20 no or minimal exercise, in the early weeks after BCS. However, with the time and support of  
21  
22 professional and social contacts, the patients expressed an increased sense of the purpose of  
23  
24 exercise. Support from external sources, as well as own first-hand experience, produced this  
25  
26 sense of purpose. The motivation along with proper instruction of tailored exercise intervention  
27  
28 is projected to offset the psychological resistance in the early weeks after BCS (Figure 1). This  
29  
30 pattern is consistent with the participants’ actual amount of PA participation, which increased  
31  
32 gradually from immediately after surgery to four weeks after surgery (Table 4).  
33  
34  
35

## 36 **DISCUSSION**

### 37 **Summary of Results**

38  
39  
40 We employed an in-depth interview technique among breast cancer survivors within  
41  
42 one month after BCS and identified the key barriers and facilitators of exercise. Physical  
43  
44 constraints that were prominent in the early weeks, as reported in the literature,<sup>23,24</sup> along with  
45  
46 the pre-existing perception and attitude toward exercise developed psychological resistance to  
47  
48 exercise among the patients. However, an increase in motivation to exercise was observed  
49  
50 among patients in later weeks due to more encouragement from others, as was reported in other  
51  
52 studies,<sup>25-27</sup> and higher sense of purpose from their own experience.  
53  
54  
55

56  
57 This process of increasing the sense of purpose, replacing the psychological resistance,  
58  
59 seemed to be propelled by professional intervention conducted at the right time with the correct  
60

1  
2  
3  
4 exercise. All participants agreed that more accurate information and education were required  
5  
6 to promote exercise. Multiple physical, psychological, and environmental circumstances  
7  
8 served as conditions for psychological resistance among patients. The resistance grounded on  
9  
10 the anxiety and fear of unintended injuries and unanticipated side-effects as a cancer survivor  
11  
12 can only be overcome through professional diagnosis and exercise prescription. The  
13  
14 complementary PA data revealed that patients' sense of purpose was positively associated with  
15  
16 their actual amount of PA participation, reinforcing the requirement for professional  
17  
18 intervention at the right time.  
19  
20  
21

### 22 **Study Limitations and Strengths**

23  
24  
25 This qualitative study included only 33 participants. Hence, generalization of the  
26  
27 results to all breast cancer survivors should be made with caution. Considering that the  
28  
29 recruiting site was one of the major tertiary hospitals in Korea, the lived experiences of people  
30  
31 living in rural areas or those treated in smaller hospitals, for instance, could not be captured in  
32  
33 the current study. Therefore, to advance our understanding regarding the professional  
34  
35 intervention that was identified as the key factor to promote exercise among the participants, a  
36  
37 randomized control study should be performed. The long-term and short-term physical as well  
38  
39 as psychological benefits of exercise can be examined more comprehensively by investigating  
40  
41 the effects of exercise intervention, preferably in a longitudinal study.  
42  
43  
44

45  
46 The strengths of the current study included repeated interviews over four weeks after  
47  
48 surgery which enabled us to observe the change in patients' attitude toward exercise over time.  
49  
50 Especially, in the current study, breast cancer patients were interviewed from only one week  
51  
52 after surgery before implementation of exercise or rehabilitation intervention; however, recent  
53  
54 studies have reported the importance of early exercise intervention after surgery in cancer  
55  
56 patients.  
57  
58

### 59 **Clinical Implications**

60

1  
2  
3  
4 To mitigate the constant feedback loop between physical and psychological excuses,  
5  
6 a tailored exercise intervention, considering patients physical and psychological conditions,  
7  
8 should be designed. Considering the diverse anxiety expressed in the current study, tailored  
9  
10 programs should consider each patient's physical and psychological needs to optimize the  
11  
12 potential effects of the program.  
13  
14

15  
16 Many breast cancer patients do not participate in PA and experience significant muscle  
17  
18 mass loss during the first few months after surgery, which is associated with increased risk of  
19  
20 type 2 diabetes and worse prognosis, including increased risk of recurrence.<sup>28, 29</sup> The findings  
21  
22 of the current study revealed that breast cancer patients can benefit from early participation of  
23  
24 exercise and PA, which may prevent loss of shoulder ROM and strength after BCS. Therefore,  
25  
26 the importance of exercise needs to be emphasized and educated, not only among the patients  
27  
28 but also among the health care professionals so that their recommendations to the patients can  
29  
30 have real impact in changing motivation as well as behavior. In addition, the current study  
31  
32 provides information regarding the attitude of breast cancer patients toward exercise during the  
33  
34 early recovery stage after surgery and thus, promotes the development of appropriate  
35  
36 intervention strategies.  
37  
38  
39

## 40 41 **Conclusions**

42  
43 Thirty-three breast cancer survivors shared their experience and thoughts regarding  
44  
45 exercise after BCS. Commonly expressed needs of the participants were summed as a  
46  
47 professional intervention that takes into account the time after surgery and each individual's  
48  
49 physical condition. Exercise was not only a matter of motivation and will power, but also a  
50  
51 matter of resources that can be used with physical and psychological comfort.  
52  
53  
54  
55  
56  
57  
58  
59  
60

### **Contributorship statement**

SJY and JYJ participated in study design. SJY, JHM, JYK, SIK and JYJ participated in data collection. SJY, ASJ, JHM, JYB, JYK, SHP, SIK and JYJ participated in data analysis and interpretation. ASJ, SJY, CWL, YJY, JMH and JYJ participated in the manuscript writing. All authors participated in the manuscript review and revision. All authors thank participants of the study and research coordinators at the Yonsei Cancer Center.

### **Competing interests**

None declared.

### **Funding**

This work was supported by the National Research Foundation of Korea grant number NRF-2017S1A5A2A01024689 and the National R&D Program for Cancer Control, Ministry of Health and Welfare, Republic of Korea (2021-11-0778)

### **Data sharing statement**

Data are available upon reasonable request. Interview transcripts will be available upon request on the specific area of interest.

Figure 1. Relations among categories according to time, which changes the weight of the barriers and facilitators of exercise

## References:

1. Cancer.go.kr [homepage on the internet]. National Cancer Information Center: Ministry of Health and Welfare; [Cited 2021 January 9]. Available from: <https://www.cancer.go.kr/>
2. Hong S, Won Y, Park Y, Jung K, Kong H, Lee E. Cancer statistics in Korea: incidence, mortality, survival, and prevalence in 2017. *Cancer Res Treat*. 2020;52(2):335-350.
3. Nccn.org [homepage on the internet]. National Comprehensive Cancer Network; [Cited 2021 Jun 8]. Available from: [https://www.nccn.org/professionals/physician\\_gls/pdf/breast.pdf](https://www.nccn.org/professionals/physician_gls/pdf/breast.pdf)
4. Ebaugh D, Spinelli B, Schmitz KH. Shoulder impairments and their association with symptomatic rotator cuff disease in breast cancer survivors. *Med Hypotheses*. 2011;77(4):481-487.
5. Fabro EAN, Bergmann A, e Silva BdA, Ribeiro ACP, de Souza Abrahão K, Ferreira MGDCL, et al. Post-mastectomy pain syndrome: incidence and risks. *The Breast*. 2012;21(3):321-325.
6. Hayes SC, Johansson K, Stout NL, Prosnitz R, Armer JM, Gabram S, et al. Upper-body morbidity after breast cancer: incidence and evidence for evaluation, prevention, and management within a prospective surveillance model of care. *Cancer*. 2012;118(S8):2237-2249.
7. Golden-Kreutz DM, Andersen BL. Depressive symptoms after breast cancer surgery: Relationships with global, cancer-related, and life event stress. *Psychooncology*. 2004;13(3):211-220.
8. Spei M-E, Samoli E, Bravi F, La Vecchia C, Bamia C, Benetou V. Physical activity in breast cancer survivors: A systematic review and meta-analysis on overall and breast cancer survival. *The Breast*. 2019;44:144-152.
9. Ten Wolde B, Kuiper M, de Wilt JH, Strobbe LJ. Postoperative complications after breast cancer surgery are not related to age. *Ann Surg Oncol*. 2017;24(7):1861-1867.
10. Sagen A, Kaaresen R, Sandvik L, Thune I, Risberg MA. Upper limb physical function and adverse effects after breast cancer surgery: a prospective 2.5-year follow-up study and preoperative measures. *Arch Phys Med Rehabil*. 2014;95(5):875-881.
11. Lacomba MT, Sánchez MJY, Goñi ÁZ, Merino DP, del Moral OM, Téllez EC, et al. Effectiveness of early physiotherapy to prevent lymphoedema after surgery for breast cancer: randomised, single blinded, clinical trial. *BMJ*. 2010;340:b5396.
12. Cinar N, Seckin Ü, Keskin D, Bodur H, Bozkurt B, Cengiz Ö. The effectiveness of early rehabilitation in patients with modified radical mastectomy. *Cancer Nurs*. 2008;31(2):160-165.
13. Möller UO, Beck I, Rydén L, Malmström M. A comprehensive approach to rehabilitation interventions following breast cancer treatment-a systematic review of systematic reviews. *BMC cancer*. 2019;19(1):1-20.
14. Andrade RD, Junior GJF, Capistrano R, Beltrame TS, Pelegrini A, Crawford DW, et al. Constraints to leisure-time physical activity among Brazilian workers. *Ann Leis Res*. 2019;22(2):202-214.
15. Payán DD, Sloane DC, Illum J, Lewis LB. Intrapersonal and environmental barriers to physical activity among Blacks and Latinos. *J Nutr Educ Behav*. 2019;51(4):478-485.



16. Son JS, Chen G, Liechty T, Janke MC, West ST, Wong JD, et al. The Role of Facilitators in the Constraint Negotiation of Leisure-Time Physical Activity. *Leis Sci.* 2021;1-20.
17. Patton MQ. *Qualitative evaluation and research methods.* SAGE Publications, Inc; 1990.
18. Guest G, Bunce A, Johnson L. How many interviews are enough? An experiment with data saturation and variability. *Field methods.* 2006;18(1):59-82.
19. Armstrong T, Bull F. Development of the world health organization global physical activity questionnaire (GPAQ). *J Public Health.* 2006;14(2):66-70.
20. Lee J, Lee C, Min J, Kang D-W, Kim J-Y, Yang HI, et al. Development of the Korean Global Physical Activity Questionnaire: reliability and validity study. *Glob Health Promot.* 2020;27(3):44-55.
21. Lincoln YS, Guba EG. *Naturalistic inquiry.* Sage; 1985.
22. Corbin J, Strauss A. *Basics of Qualitative Research: Techniques and Procedures for Developing Grounded Theory.* Sage Publications; 1998.
23. Shamley D, Srinaganathan R, Oskrochi R, Lascrain-Aguirrebeña I, Sugden E. Three-dimensional scapulothoracic motion following treatment for breast cancer. *Breast Cancer Res Treat.* 2009;118(2):315-322.
24. Baron RH, Kelvin JF, Bookbinder M, Cramer L, Borgen PI, Thaler HT. Patients' sensations after breast cancer surgery: a pilot study. *Cancer Practice.* 2000;8(5):215-222.
25. Abe M, Iwase T, Takeuchi T, Murai H, Miura S. A randomized controlled trial on the prevention of seroma after partial or total mastectomy and axillary lymph node dissection. *Breast cancer.* 1998;5(1):67-69.
26. Gillis C, Li C, Lee L, Awasthi R, Augustin B, Gamsa A, et al. Prehabilitation versus rehabilitation: a randomized control trial in patients undergoing colorectal resection for cancer. *Anesthesiology.* 2014;121(5):937-947.
27. Jones LW, Courneya KS, Fairey AS, Mackey JR. Effects of an oncologist's recommendation to exercise on self-reported exercise behavior in newly diagnosed breast cancer survivors: a single-blind, randomized controlled trial. *Ann Behav Med.* 2004;28(2):105-113.
28. Pan K, Chlebowski RT, Mortimer JE, Gunther MJ, Rohan T, Vitolins MZ, et al. Insulin resistance and breast cancer incidence and mortality in postmenopausal women in the Women's Health Initiative. *Cancer.* 2020;126(16):3638-3647.
29. Caan BJ, Feliciano EMC, Prado CM, Alexeeff S, Kroenke CH, Bradshaw P, et al. Association of muscle and adiposity measured by computed tomography with survival in patients with nonmetastatic breast cancer. *JAMA Oncol.* 2018;4(6):798-804.

1  
2  
3  
4  
5  
6  
7  
8  
9  
10  
11  
12  
13  
14  
15  
16  
17  
18  
19  
20  
21  
22  
23  
24  
25  
26  
27  
28  
29  
30  
31  
32  
33  
34  
35  
36  
37  
38  
39  
40  
41  
42  
43  
44  
45  
46

For peer review only

Figure 1. Relations among categories according to time, which changes the weight of the barriers and facilitators of exercise

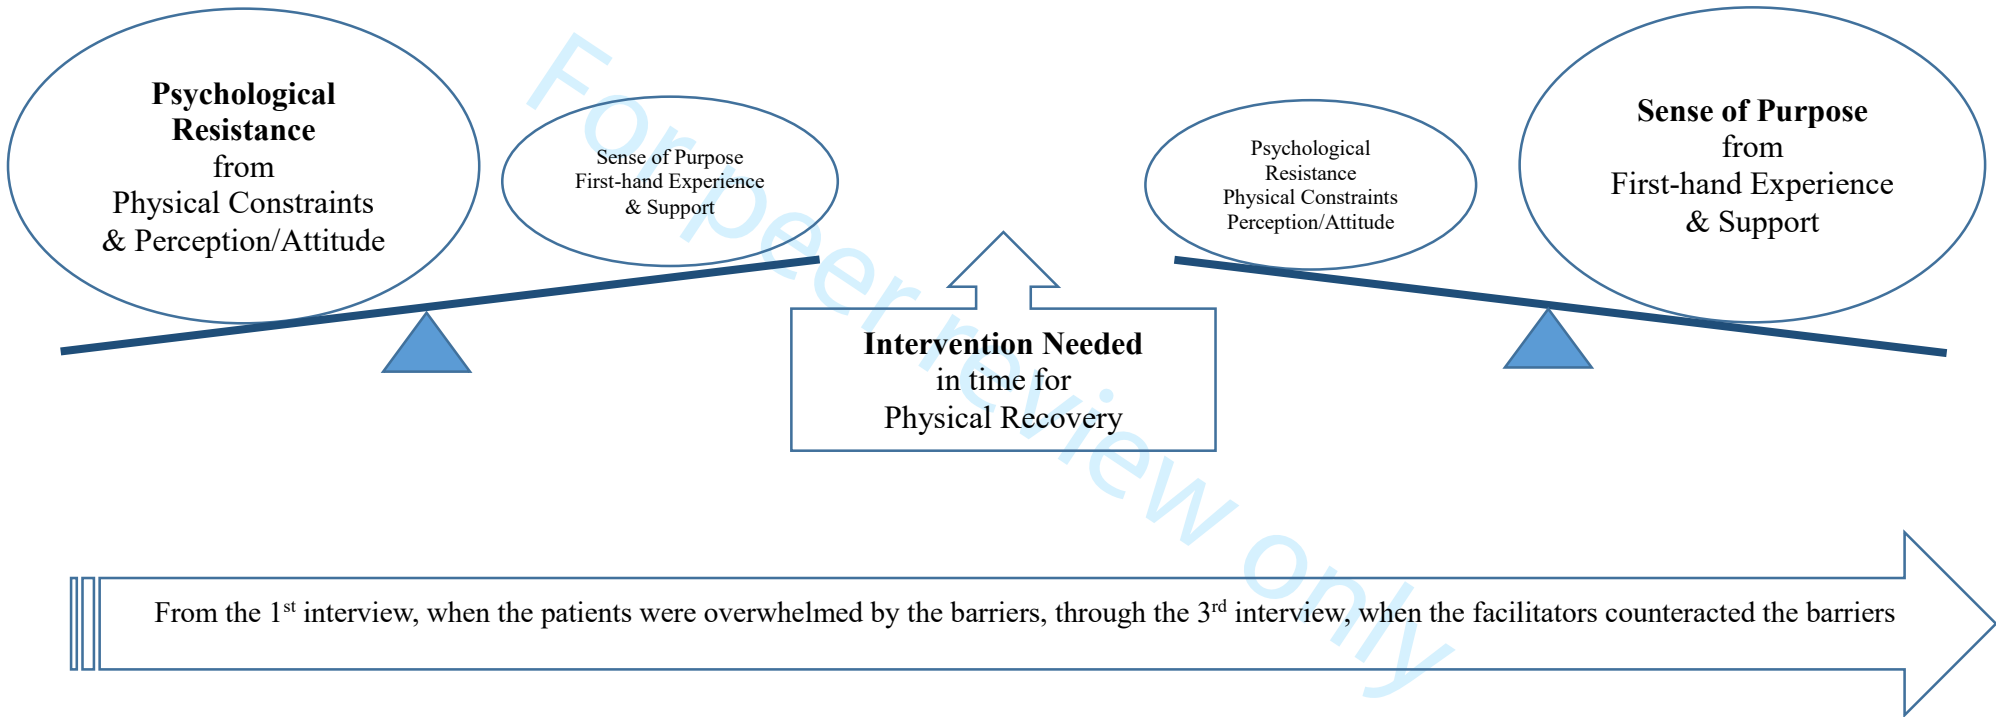

## COREQ (COnsolidated criteria for REporting Qualitative research) Checklist

A checklist of items that should be included in reports of qualitative research. You must report the page number in your manuscript where you consider each of the items listed in this checklist. If you have not included this information, either revise your manuscript accordingly before submitting or note N/A

| Topic                                          | Item No. | Guide Questions/Description                                                                                                                                 | Reported on Page No. |
|------------------------------------------------|----------|-------------------------------------------------------------------------------------------------------------------------------------------------------------|----------------------|
| <b>Domain 1: Research team and reflexivity</b> |          |                                                                                                                                                             |                      |
| <i>Personal characteristics</i>                |          |                                                                                                                                                             |                      |
| Interviewer/facilitator                        | 1        | Which author/s conducted the interview or focus group?                                                                                                      | 7                    |
| Credentials                                    | 2        | What were the researcher's credentials?<br>e.g. PhD, MD                                                                                                     | 1                    |
| Occupation                                     | 3        | What was their occupation at the time of the study?                                                                                                         | 7                    |
| Gender                                         | 4        | Was the researcher male or female?                                                                                                                          | -                    |
| Experience and training                        | 5        | What experience or training did the researcher have?                                                                                                        | 7                    |
| <i>Relationship with participants</i>          |          |                                                                                                                                                             |                      |
| Relationship established                       | 6        | Was a relationship established prior to study commencement?                                                                                                 | 5                    |
| Participant knowledge of the interviewer       | 7        | What did the participants know about the researcher?<br>e.g. personal goals, reasons for doing the research                                                 | --                   |
| Interviewer characteristics                    | 8        | What characteristics were reported about the interviewer/facilitator?<br>e.g. Bias, assumptions, reasons and interests in the research topic                | 7                    |
| <b>Domain 2: Study design</b>                  |          |                                                                                                                                                             |                      |
| <i>Theoretical framework</i>                   |          |                                                                                                                                                             |                      |
| Methodological orientation and Theory          | 9        | What methodological orientation was stated to underpin the study?<br>e.g. grounded theory, discourse analysis, ethnography, phenomenology, content analysis | 8                    |
| <i>Participant selection</i>                   |          |                                                                                                                                                             |                      |
| Sampling                                       | 10       | How were participants selected?<br>e.g. purposive, convenience, consecutive, snowball                                                                       | 5                    |
| Method of approach                             | 11       | How were participants approached?<br>e.g. face-to-face, telephone, mail, email                                                                              | 5                    |
| Sample size                                    | 12       | How many participants were in the study?                                                                                                                    | 5                    |
| Non-participation                              | 13       | How many people refused to participate or dropped out?<br>Reasons?                                                                                          | 5                    |
| <i>Setting</i>                                 |          |                                                                                                                                                             |                      |
| Setting of data collection                     | 14       | Where was the data collected?<br>e.g. home, clinic, workplace                                                                                               | 6                    |
| Presence of non-participants                   | 15       | Was anyone else present besides the participants and researchers?                                                                                           | 6                    |
| Description of sample                          | 16       | What are the important characteristics of the sample?<br>e.g. demographic data, date                                                                        | Table2               |

| Topic                                  | Item No. | Guide Questions/Description                                                                                                     | Reported on Page No. |
|----------------------------------------|----------|---------------------------------------------------------------------------------------------------------------------------------|----------------------|
| <i>Data collection</i>                 |          |                                                                                                                                 |                      |
| Interview guide                        | 17       | Were questions, prompts, guides provided by the authors? Was it pilot tested?                                                   | Table 1              |
| Repeat interviews                      | 18       | Were repeat interviews carried out? If yes, how many?                                                                           | 6                    |
| Audio/visual recording                 | 19       | Did the research use audio or visual recording to collect the data?                                                             | 6                    |
| Field notes                            | 20       | Were field notes made during and/or after the interview or focus group?                                                         | 6                    |
| Duration                               | 21       | What was the duration of the interviews or focus group?                                                                         | 6                    |
| Data saturation                        | 22       | Was data saturation discussed?                                                                                                  | 5                    |
| Transcripts returned                   | 23       | Were transcripts returned to participants for comment and/or correction?                                                        | 7-8                  |
| <b>Domain 3: analysis and findings</b> |          |                                                                                                                                 |                      |
| <i>Data analysis</i>                   |          |                                                                                                                                 |                      |
| Number of data coders                  | 24       | How many data coders coded the data?                                                                                            | 8                    |
| Description of the coding tree         | 25       | Did authors provide a description of the coding tree?                                                                           | Table 3              |
| Derivation of themes                   | 26       | Were themes identified in advance or derived from the data?                                                                     | 8                    |
| Software                               | 27       | What software, if applicable, was used to manage the data?                                                                      | N/A                  |
| Participant checking                   | 28       | Did participants provide feedback on the findings?                                                                              | 7-8                  |
| <i>Reporting</i>                       |          |                                                                                                                                 |                      |
| Quotations presented                   | 29       | Were participant quotations presented to illustrate the themes/findings? Was each quotation identified? e.g. participant number | 12-15                |
| Data and findings consistent           | 30       | Was there consistency between the data presented and the findings?                                                              | 8-15                 |
| Clarity of major themes                | 31       | Were major themes clearly presented in the findings?                                                                            | 8-15<br>Table 3      |
| Clarity of minor themes                | 32       | Is there a description of diverse cases or discussion of minor themes?                                                          | 15-16<br>Table 3     |

Developed from: Tong A, Sainsbury P, Craig J. Consolidated criteria for reporting qualitative research (COREQ): a 32 item checklist for interviews and focus groups. *International Journal for Quality in Health Care*. 2007. Volume 19, Number 6: pp. 349–35

# BMJ Open

## Tearing down the barriers to exercise after mastectomy: A qualitative inquiry to facilitate exercise among breast cancer survivors

|                                 |                                                                                                                                                                                                                                                                                                                                                                                                                                                                                                                                                                                                                                                                                                                                                                                                                                                                                                                           |
|---------------------------------|---------------------------------------------------------------------------------------------------------------------------------------------------------------------------------------------------------------------------------------------------------------------------------------------------------------------------------------------------------------------------------------------------------------------------------------------------------------------------------------------------------------------------------------------------------------------------------------------------------------------------------------------------------------------------------------------------------------------------------------------------------------------------------------------------------------------------------------------------------------------------------------------------------------------------|
| Journal:                        | <i>BMJ Open</i>                                                                                                                                                                                                                                                                                                                                                                                                                                                                                                                                                                                                                                                                                                                                                                                                                                                                                                           |
| Manuscript ID                   | bmjopen-2021-055157.R2                                                                                                                                                                                                                                                                                                                                                                                                                                                                                                                                                                                                                                                                                                                                                                                                                                                                                                    |
| Article Type:                   | Original research                                                                                                                                                                                                                                                                                                                                                                                                                                                                                                                                                                                                                                                                                                                                                                                                                                                                                                         |
| Date Submitted by the Author:   | 01-Jul-2022                                                                                                                                                                                                                                                                                                                                                                                                                                                                                                                                                                                                                                                                                                                                                                                                                                                                                                               |
| Complete List of Authors:       | Yeon, Sujin; Yonsei University, Department of Sport Industry Studies<br>Jeong, Ansuk; Yonsei University, Institute of Convergence Science<br>Min, Jihee; Yonsei University, Department of Sport Industry Studies<br>Byeon, Jiyong; Yonsei University, Department of Sport Industry Studies<br>Yoon, Yong Jin; Yonsei University, Department of Sport Industry Studies<br>Heo, Jinmoo; Yonsei University, Department of Sport Industry Studies<br>Lee, Chulwon; Yonsei University, Department of Sport Industry Studies<br>Kim, Jeeeye; Yonsei University College of Medicine, Department of Surgery<br>Park, Seho; Yonsei University College of Medicine, Department of Surgery<br>Kim, Seung Il; Yonsei University College of Medicine, Department of Surgery<br>Jeon, Justin ; Yonsei University, Department of Sport Industry Studies;<br>Yonsei University, Exercise Medicine Center for Diabetes and Cancer Patients |
| <b>Primary Subject Heading</b>: | Sports and exercise medicine                                                                                                                                                                                                                                                                                                                                                                                                                                                                                                                                                                                                                                                                                                                                                                                                                                                                                              |
| Secondary Subject Heading:      | Mental health, Qualitative research, Rehabilitation medicine                                                                                                                                                                                                                                                                                                                                                                                                                                                                                                                                                                                                                                                                                                                                                                                                                                                              |
| Keywords:                       | SPORTS MEDICINE, MENTAL HEALTH, ONCOLOGY, Breast surgery < SURGERY, QUALITATIVE RESEARCH                                                                                                                                                                                                                                                                                                                                                                                                                                                                                                                                                                                                                                                                                                                                                                                                                                  |
|                                 |                                                                                                                                                                                                                                                                                                                                                                                                                                                                                                                                                                                                                                                                                                                                                                                                                                                                                                                           |

SCHOLARONE™  
Manuscripts



I, the Submitting Author has the right to grant and does grant on behalf of all authors of the Work (as defined in the below author licence), an exclusive licence and/or a non-exclusive licence for contributions from authors who are: i) UK Crown employees; ii) where BMJ has agreed a CC-BY licence shall apply, and/or iii) in accordance with the terms applicable for US Federal Government officers or employees acting as part of their official duties; on a worldwide, perpetual, irrevocable, royalty-free basis to BMJ Publishing Group Ltd ("BMJ") its licensees and where the relevant Journal is co-owned by BMJ to the co-owners of the Journal, to publish the Work in this journal and any other BMJ products and to exploit all rights, as set out in our [licence](#).

The Submitting Author accepts and understands that any supply made under these terms is made by BMJ to the Submitting Author unless you are acting as an employee on behalf of your employer or a postgraduate student of an affiliated institution which is paying any applicable article publishing charge ("APC") for Open Access articles. Where the Submitting Author wishes to make the Work available on an Open Access basis (and intends to pay the relevant APC), the terms of reuse of such Open Access shall be governed by a Creative Commons licence – details of these licences and which [Creative Commons](#) licence will apply to this Work are set out in our licence referred to above.

Other than as permitted in any relevant BMJ Author's Self Archiving Policies, I confirm this Work has not been accepted for publication elsewhere, is not being considered for publication elsewhere and does not duplicate material already published. I confirm all authors consent to publication of this Work and authorise the granting of this licence.

1  
2  
3  
4 Tearing down the barriers to exercise after mastectomy: A qualitative inquiry to facilitate  
5  
6 exercise among breast cancer survivors  
7  
8  
9  
10  
11  
12

13 Sujin Yeon<sup>1\*</sup>, Ansuk Jeong<sup>2\*</sup>, Jihee Min<sup>1</sup>, Jiyong Byeon<sup>1</sup>, Yong Jin Yoon<sup>1</sup>, Jinmoo Heo<sup>1</sup>,  
14  
15 Chulwon Lee<sup>1</sup>, Jeeye Kim<sup>3</sup>, Seho Park<sup>3</sup>, Seungil Kim<sup>3</sup>, & Justin Y. Jeon<sup>1,2, 4,5†</sup>  
16  
17  
18  
19

20 <sup>1</sup> Department of Sport Industry Studies, Exercise Medicine and Rehabilitation Laboratory,  
21 Yonsei University, Seoul, Korea; <sup>2</sup> Institute of Convergence Science, Yonsei University,  
22 Seoul, Korea; <sup>3</sup> Division of Breast Surgery, Department of Surgery, Yonsei University  
23 College of Medicine, Seoul, Korea; <sup>4</sup> Exercise Medicine Center for Diabetes and Cancer  
24 Patients, Yonsei University, Seoul, Korea; <sup>5</sup> Cancer Prevention Center, Yonsei Cancer  
25 Center, Shinchon Severance Hospital, Seoul, Korea  
26  
27  
28  
29  
30  
31  
32  
33  
34  
35  
36  
37  
38  
39  
40  
41  
42  
43  
44  
45  
46  
47  
48  
49  
50  
51  
52  
53  
54  
55

56 All the authors have no conflict of interest to declare.  
57  
58  
59  
60

\* These authors equally contributed to this work as first author.

† Correspondence should be addressed to: Justin Y. Jeon; Department of Sport Industry  
Studies, Yonsei University, 50 Shinchon-ro, Seoul, South Korea, 03722; jjeon@yonsei.ac.kr;  
Seungil Kim, Department of Surgery, Yonsei University College of Medicine, 50 Yonsei-ro,  
Seodaemun-gu, Seoul 120-752, Republic of Korea, skim@yuhs.ac

Word Count: 3125



## Abstract

*Objective.* Proper exercise immediately after breast cancer surgery (BCS) may prevent unnecessary physical and psychological decline resulting from surgery; however, patients' attitude, barriers, and facilitators for exercise during this period have not been studied. Hence, the current study explored the barriers and facilitators of exercise among breast cancer patients through multiple interviews immediately after surgery through 4 weeks after BCS.

*Methods.* We conducted three in-depth interviews of 33 breast cancer patients within one month after BCS.

*Results.* We identified 44 themes, 10 codes, and 5 categories from interview results. Physical constraints and psychological resistance were identified as the barriers to exercise, while a sense of purpose and first-hand exercise experience were identified as the facilitators of exercise. By conducting the interviews over the course of 4 weeks after surgery, we monitored patterns of changes in barriers and facilitators over time. Overall, our analyses identified that professional intervention based on the time since surgery and the physical state after BCS is essential. The intervention would counteract the overwhelming psychological resistance in the early weeks by developing a sense of purpose in the later weeks.

*Conclusions.* We made suggestions for future research and exercise intervention programs that can benefit breast cancer survivors based on the categories, codes, and themes identified in the current study.

**Keywords:** barriers to exercise; breast cancer; cancer survivors; exercise intervention; exercise promotion; facilitators of exercise; professional support

## Strengths and Limitations

- The participants were recruited immediately after the breast cancer surgery and shared their experiences regarding multiple factors.

- To examine the effect of time, multiple interviews were conducted from immediately after surgery up to one month after surgery.
- This study was conducted at the tertiary hospital in South Korea and generalization of the findings from the current study to other regions and countries should be made careful.

For peer review only

## BACKGROUND

The incidence of breast cancer has been continually increasing. Currently, breast cancer is the most common cancer among women, accounting for 24.2% of the cases worldwide and 20.3% of the cases in South Korea.<sup>1</sup> Although the 5-year survival rate of breast cancer is over 90 % for Stage 0-2 breast cancer patients in South Korea, a substantial number of breast cancer patients experience breast cancer recurrence and suffer heavily from side effects of cancer treatments.<sup>2</sup> Although the rate of breast-conserving surgery has increased from 37.6% in 2002 to 67.4% in 2017, many breast cancer patients develop both short-term and long-term physical impairments such as lymphedema, decreased shoulder strength, and range of motion (ROM).<sup>3-6</sup> In addition to physical impairment, the prevalence of depression, distress, anger, and social isolation is high among breast cancer survivors.<sup>7</sup>

Exercise and physical activity (PA) improve the prognosis of breast cancer (e.g., decrease breast cancer-specific and all-cause mortality).<sup>8</sup> The benefit of exercise among breast cancer patients is not limited to improvement in survival. Early implementation of exercises has been shown to reduce surgery-related complications,<sup>9</sup> pain,<sup>10</sup> and risk of lymphedema<sup>11</sup>. Exercises such as shoulder ROM exercise and isometric and passive stretching shortly after surgery could improve shoulder ROM during early recovery after surgery.<sup>12</sup>

Although ample evidence exists on the benefits of exercise on recovery after breast cancer surgery (BCS),<sup>13</sup> breast cancer patients are reluctant to participate in exercise during early recovery. Furthermore, few studies have investigated the attitude toward exercise and exercise experience, barriers, and facilitators over an extended period of time, particularly immediately after BCS until 4 weeks after surgery. A few qualitative studies have investigated these factors in cancer survivors after a few months of surgery<sup>14-16</sup>. Considering the various different needs of the breast cancer survivors depending on the time post-surgery, more information on the barriers and facilitators of exercise immediately after BCS can potentially

1  
2  
3  
4 be useful in tailoring exercise intervention programs to the specific needs of breast cancer  
5  
6 survivors.  
7

8  
9 In these regards, the current study investigated the factors related to exercise promotion  
10 within one month after BCS. More specifically, by employing the in-depth interview method,  
11 the study investigated: (1) the barriers and the facilitators of exercise for breast cancer survivors;  
12  
13 (2) the changes in these factors according to time after BCS. Additionally, the current study  
14 aimed to complement the intentions expressed in the interviews with the actual behaviors based  
15  
16 on the quantitative data on PA.  
17  
18  
19  
20  
21

## 22 **METHODS**

### 23 **Participants**

24  
25 We recruited 33 women who underwent BCS at the breast cancer center of a university  
26 medical center in Seoul, Korea, between February 14, 2019 and November 12, 2019, using the  
27  
28 criterion sampling technique.<sup>17</sup> Patients who were over 70 years old, had undergone bilateral  
29 or reconstruction surgery, or had a history of previous cancer were excluded. The recruitment  
30  
31 of new participants was stopped when new data from additional participants did not add new  
32  
33 ideas or concepts related to the purpose of the study.<sup>18</sup>  
34  
35  
36  
37  
38  
39  
40

### 41 **Procedures**

42  
43 Potential participants who met all the inclusion criteria were contacted by the physician  
44 to explain the research participation opportunity. Patients who agreed to participate in multiple  
45  
46 interviews after BCS signed the informed consent. The same procedure was repeated until the  
47  
48 saturation point.<sup>17</sup> Three of 36 participants withdrew (one patient dropped out because of re-  
49  
50 surgery and the other two refused to participate); thus, 33 patients participated in the current  
51  
52 study.  
53  
54  
55  
56

57 The research participants met with the first author of the current study one day before  
58  
59 BCS, to build a collaborative relationship between the researcher and the participant. After  
60

BCS, the interview was conducted three times during clinic visits: first interview within two weeks after surgery; second interview between two and three weeks after surgery; and third interview between three weeks and one month after surgery. All interviews were conducted one-on-one in Korean. With the participants' permission, the interviews were audio-recorded and transcribed verbatim, with two different semi-structured interview questionnaires (Table 1). Only after all the three interviews were completed, a professional exercise consultation was provided as a compensation for research participation, not as a component of this study.

Table 1. Interview questionnaires

| Interview   | Questions                                                                                                                                                                                                                                                                                                                                                                                                                                                                                      |
|-------------|------------------------------------------------------------------------------------------------------------------------------------------------------------------------------------------------------------------------------------------------------------------------------------------------------------------------------------------------------------------------------------------------------------------------------------------------------------------------------------------------|
| 1st         | <ul style="list-style-type: none"> <li>• How is the surgery site?</li> <li>• Are there any functional changes in your arm?</li> <li>• Are there any changes in your daily-living activities such as doing chores, putting clothes on, and washing dishes?</li> <li>• Did you exercise during the past week (after surgery)?               <ul style="list-style-type: none"> <li>• If yes, how often? Why did you exercise?</li> <li>• If no, why did you not exercise?</li> </ul> </li> </ul> |
| 2nd and 3rd | <ul style="list-style-type: none"> <li>• Compared to the last week, is there any change at the surgery site?</li> <li>• Compared to the last week, are there any changes in your activities of daily living?</li> <li>• Did you exercise during the past week (after surgery)?               <ul style="list-style-type: none"> <li>• If yes, how often? Why did you exercise?</li> <li>• If no, why did you not exercise?</li> </ul> </li> </ul>                                              |
| 3rd         | <ul style="list-style-type: none"> <li>• Could you specify the biggest barriers and facilitators of exercise for the past month?</li> <li>• Would you like say anything to other breast cancer survivors?</li> </ul>                                                                                                                                                                                                                                                                           |

The complementary measurement of the participants' PA level was performed during each interview using the Global PA Questionnaire (GPAQ), developed by the World Health Organization (WHO).<sup>19</sup> The GPAQ comprises 16 items in four domains of PA: work, leisure time, transportation, and sedentary behavior. The reliability and validity of the Korean version of the GPAQ were examined in a previous study.<sup>20</sup> We added a measure of walking and its frequency and duration, which is not included in the original GPAQ but is relevant to the

1  
2  
3  
4 current study.  
5

### 6 **Ethics Approval Statement**

7  
8  
9 This study was approved by the Institutional Review Board of the hospital (IRB No.  
10 4-2018-1094). All participants provided written informed consent and agreed to be interviewed  
11 multiple times within one month after BCS.  
12  
13

### 14 **Trustworthiness**

15  
16 To increase the trustworthiness of data,<sup>21</sup> we have employed three different methods:  
17 reflective note, observation, and member check. After each interview, the exercise specialist  
18 reflected on their performance as an interviewer. Mistakes and important lessons learnt were  
19 recorded in a reflective note, and methods to improve the quality of future interviews were  
20 practiced before the next interview. A sufficient amount of time was spent observing  
21 participants' physical performance and symptoms, including shoulder ROM, strength, pain,  
22 and other medical treatment. To increase the reliability of the findings, interviews were  
23 conducted three times over four weeks as participants underwent treatment. The transcript and  
24 summary of each interview were confirmed by the participants to ensure the transcriptions and  
25 summaries correctly reflected what they intended to express.  
26  
27  
28  
29  
30  
31  
32  
33  
34  
35  
36  
37  
38  
39  
40

### 41 **Analysis**

42  
43 Guided by the Grounded Theory,<sup>22</sup> the team started with open coding, identifying the  
44 themes that emerged from the transcripts. In addition, the field notes were included in the  
45 analysis to avoid loss of non-verbal information. Immediately after the team agreed on the first  
46 group of themes collectively, the authors worked on the subsequent transcripts individually.  
47 The team conducted regular meetings and worked on abstracting the codes and then the  
48 categories to proceed to the selective coding collectively. During the constant comparative  
49 analysis, member checking was performed to increase the validity of the analysis. The analysis  
50 results were sent to three randomly selected interviewees to confirm the meaning and nuance  
51  
52  
53  
54  
55  
56  
57  
58  
59  
60

of answers, and thereby, their experience as breast cancer survivors.

Complementary quantitative data analysis was performed using a repeated measures analysis of variance to compare the means of total PA total and walk, before surgery and during the first, second, and third interview. To determine whether total PA and walk time is different from baseline presurgery levels, paired t-test was used.

### Patient and Public Involvement

The research team developed the research question grounded on the previous experiences with people who underwent BCS. The understanding led the research team to employing qualitative approach with multiple in-depth interviews for an extended period of time. By adopting member-checking process, the team ensured the involvement of the participants in the analysis stage as well. The publication of this research will help disseminate the results to the public.

## RESULTS

### Participant Description

The characteristics of the 33 participants are presented in Table 2. Characteristics such as age, weight, surgery type, cancer stage, dominant arm, operation side, post-operative day (POD, from 1 through 30 days), and whether they had neo-adjuvant chemotherapy were analyzed.

Table 2. Characteristics of the participants

| ID | Age Range (years) | Type of Surgery | Cancer Stage |
|----|-------------------|-----------------|--------------|
| 1  | 60-64             | TM/SLNB         | 1A           |
| 2  | 55-59             | TM/SLNB         | 0            |
| 3  | 50-54             | TM/SLNB         | 2A           |
| 4  | 35-39             | TM/ALND         | 3A           |
| 5  | 55-59             | TM/ALND         | 1A           |
| 6  | 55-59             | TM/ALND         | 2B           |
| 7  | 65-69             | PM/SLNB         | 1A           |
| 8  | 50-54             | PM/SLNB         | 1A           |

|    |    |       |         |    |
|----|----|-------|---------|----|
| 1  |    |       |         |    |
| 2  |    |       |         |    |
| 3  |    |       |         |    |
| 4  | 9  | 40-44 | PM/SLNB | 1A |
| 5  | 10 | 45-49 | PM/ALND | 2A |
| 6  | 11 | 50-54 | PM/ALND | 1A |
| 7  | 12 | 55-59 | PM/ALND | 0  |
| 8  | 13 | 60-64 | PM/SLNB | 0  |
| 9  | 14 | 65-69 | PM/SLNB | 1A |
| 10 | 15 | 60-64 | PM/SLNB | 1A |
| 11 | 16 | 45-49 | PM/SLNB | 1A |
| 12 | 17 | 35-39 | PM/SLNB | 0  |
| 13 | 18 | 60-64 | PM/SLNB | 1A |
| 14 | 19 | 60-64 | PM/ALND | 1B |
| 15 | 20 | 55-59 | TM/SLNB | 1A |
| 16 | 21 | 65-69 | TM/SLNB | 1A |
| 17 | 22 | 50-54 | TM/SLNB | 1A |
| 18 | 23 | 65-69 | TM/SLNB | 0  |
| 19 | 24 | 60-64 | TM/SLNB | 1A |
| 20 | 25 | 40-44 | TM/SLNB | 0  |
| 21 | 26 | 60-64 | TM/ALND | 1A |
| 22 | 27 | 65-69 | TM/SLNB | 1A |
| 23 | 28 | 50-54 | PM/ALND | 2A |
| 24 | 29 | 60-64 | PM/ALND | 3A |
| 25 | 30 | 55-59 | TM/SLNB | 1A |
| 26 | 31 | 55-59 | TM/ALND | 2B |
| 27 | 32 | 35-39 | PM/ALND | 2A |
| 28 | 33 | 40-44 | PM/SLNB | 1A |

ALND, axillary lymph node dissection; N, No; PM, partial mastectomy; POD, post-operative day; SLNB, sentinel lymph node biopsy; TM, total mastectomy; Y, Yes.

### ***Intervention Needed in Time for Physical Recovery***

The interviewees identified multiple factors that either facilitated participants to exercise more or hindered them from exercising after BCS. Out of the 44 themes that emerged from the interviews, 10 codes and 5 categories were identified (Table 3). Physical constraints and psychological resistance were identified as the barriers for exercise, whereas the sense of purpose and first-hand exercise experience were identified as the facilitators for exercise during the early stage of rehabilitation after BCS. The overwhelming physical constraints that produced psychological resistance in the earlier weeks after surgery appeared to be gradually substituted by the sense of purpose that derived from the first-hand experience encouraged by diverse sources. This conclusion is consistent with the PA data: the motivation to perform exercise and PA materialized with time (Table 4). Quantitative data of 31 participants were



collected and analyzed with repeated measure analysis of variance, which revealed that the total PA level statistically significantly increased over time ( $F = 3.64, p < .05$ ). The supportive intervention that reflects an individual patient's physical condition can expedite the substitution process, if conducted properly. Our analyses revealed the core variable that answered our research questions was "*intervention needed in time for physical recovery*" to meet the varying needs of the survivors according to the time after BCS (Figure 1).

Table 3. Themes, codes, and categories from the interviews

| Categories                      | Codes                                          | Themes                                                                                 |
|---------------------------------|------------------------------------------------|----------------------------------------------------------------------------------------|
| Physical constraints            | Postoperative syndrome                         | Lymphedema, seroma                                                                     |
|                                 |                                                | Pain                                                                                   |
|                                 | Operation-derived condition                    | Limited mobility of the arm                                                            |
|                                 |                                                | Feeling weak                                                                           |
| Non-operation-derived condition | Drain                                          |                                                                                        |
|                                 |                                                | Neoadjuvant therapy                                                                    |
|                                 |                                                | Pre-existing physical condition                                                        |
| Psychological resistance        | Perception and attitude                        | Believing that daily living activities are sufficient                                  |
|                                 |                                                | Unaware of the requirement of exercise                                                 |
|                                 |                                                | Exercise not prioritized                                                               |
|                                 |                                                | Not wanting to burden the body                                                         |
|                                 |                                                | Lack of self-efficacy regarding exercise                                               |
|                                 | Concerns from the lack of accurate information | Psychological withdrawal                                                               |
|                                 |                                                | Concerns regarding the potential side-effects of exercise                              |
|                                 |                                                | Concerns regarding injuries                                                            |
|                                 |                                                | Concerns regarding the timing being inappropriate                                      |
|                                 |                                                | Concerns regarding the etiology and symptoms of the cancer – related to exercise       |
| Sense of purpose                | Encouragement and support                      | Own theory regarding the etiology and the symptoms of the cancer – related to exercise |
|                                 |                                                | From family                                                                            |
|                                 | Expected benefits                              | From medical professionals                                                             |
| From exercise therapists        |                                                |                                                                                        |
|                                 | From other cancer patients                     |                                                                                        |
|                                 | From media                                     |                                                                                        |
|                                 |                                                | Speed up the recovery                                                                  |

|                       |                                    |                                                                 |
|-----------------------|------------------------------------|-----------------------------------------------------------------|
|                       |                                    | Recover from the postoperative syndrome                         |
|                       |                                    | Health management                                               |
|                       |                                    | Muscular strength                                               |
|                       |                                    | Increase muscle mass                                            |
|                       |                                    | Improve flexibility                                             |
|                       |                                    | Prevent relapse by promoting health                             |
|                       |                                    | General physical health                                         |
|                       |                                    | Break unhealthy lifestyle                                       |
|                       |                                    | Prevent weight gain                                             |
|                       |                                    | Maintain healthy lifestyle                                      |
| First-hand experience | Benefits of exercise               | Reduced pain                                                    |
|                       |                                    | Promoted flexibility                                            |
|                       |                                    | Increased amount of exercise                                    |
|                       |                                    | Increased physical activities                                   |
|                       |                                    | Reduced discomforts                                             |
|                       |                                    | Expedited recovery                                              |
|                       | Heightened sense of purpose        | Attribution of cancer to the lack of exercise                   |
|                       |                                    | Want to exercise more                                           |
| Intervention needed   | Accurate information and education | Want consultation regarding symptoms                            |
|                       |                                    | Want information/education in accordance with the proper timing |

Table 4. The change of physical activity level (pre-surgery to 4 weeks post-surgery)

|                     | Before surgery<br><i>M (SD)</i> | 1 <sup>st</sup> interview<br><i>M (SD)</i> | 2 <sup>nd</sup> interview<br><i>M (SD)</i> | 3 <sup>rd</sup> interview<br><i>M (SD)</i> | <i>p</i> for time |
|---------------------|---------------------------------|--------------------------------------------|--------------------------------------------|--------------------------------------------|-------------------|
| VPA (min/week)      | 0                               | 0                                          | 0                                          | 0                                          | N/A               |
| MPA (min/week)      | 41.0 (113.4)                    | 0                                          | 0                                          | 12.3 (54.1)                                | 0.07              |
| Total PA (min/week) | 142.6 (167.6)                   | 49.8 (61.6)*                               | 96.1 (175.4)                               | 142.6 (161.9)                              | 0.02              |
| Walk (min/week)     | 204.4 (208.0)                   | 142.1 (165.3)                              | 173.1 (139.1)                              | 222.9 (166.4)                              | 0.1               |

Total physical activity = (minutes of MVPA at week) + (minutes of leisure-time MVPA) + (minutes of transportation PA). Abbreviation: M (SD), mean (standard deviation); PA, physical activity; VPA, vigorous physical activity, MPA moderate physical activity. \**p* value < 0.05 versus baseline Total PA

## Barriers to Exercise

*Physical Constraints.* Breast cancer patients who underwent surgery experienced multiple types of physical restraints, which made it difficult for them to participate in or even think about exercise. The most frequently reported barrier to exercise was pain, followed by limited shoulder ROM, and frequent by-products of the treatment including seroma and the drain attached to the body. All these contributed to a perception of weakness throughout the body, especially among those who received neo-adjuvant chemotherapy.

*“I couldn’t exercise after the surgery. I am not eating well and do not feel strong. It’s not just my arm that feels weak; my whole body feels weak. I lay inert or just sat leaning on something, most of the time.”* (Participant #19, PM/ALND, first interview)

*“(After the drain was removed) This (seroma) started leaking and I felt so distressed. It stressed me out. Only a few drops, you know, when it leaks, are enough to feel so awkward. Thinking about it, I couldn’t exercise. This past week was more uncomfortable.”* (Participant #19, PM/ALND, third interview)

*Psychological Resistance.* These physical constraints discouraged participants from exercising because they believed that “physical activities may be harmful or at least drain their energy.” Moreover, although their physical condition permitted exercise, participants did not feel enough motivation to exercise. In some cases, anxiety regarding possible injuries overcame their wish to become more physically active. Other times, they excused themselves from doing more exercise as “daily living and house chores are good enough exercise.” In addition to these concerns and excuses, their pre-existing perception of the inefficacy of exercise appeared to discourage them from exercising after surgery.

*“Well, I didn’t do much. I couldn’t exercise at all because of the pain. The*

1  
2  
3  
4 *armpit feels tight and poking. What if moving causes more pain? Worried about it,*  
5  
6  
7 *I can't exercise..” (Participant #27, TM/SLNB, third interview)*

8  
9 *“I couldn't exercise... Well, I thought of looking over the booklet (of exercise*  
10  
11 *education), but didn't. I don't recall why I didn't, but time passed while I was*  
12  
13 *taking care of my grandkids. I put it on the dining table and didn't reach for it*  
14  
15 *later. I did try stretching my arm lying down on the bed. It wasn't painful though.”*  
16  
17  
18 (Participant #13, PM/SLNB, first interview)

19  
20 Notwithstanding, the lack of accurate information was identified as a significant  
21  
22 reason for the patients not take courage to exercise. After surgery, considering all the  
23  
24 byproducts of operation, whether anticipated or unanticipated, patients' anxiety was not  
25  
26 ungrounded. Accurate information regarding the types of activities and exercises that speed  
27  
28 up the recovery from diverse postoperative symptoms was important.

29  
30  
31  
32 *“Well, I can't find the information I need.. when should I work on muscles,*  
33  
34 *when can I jog or run.. I don't know..” (Participant #33, PM/SLNB, first*  
35  
36 interview)

37  
38  
39 Often, different health professionals such as surgeons, medical oncologists,  
40  
41 physiatrists, and plastic surgeon (in case patients underwent breast reconstruction) provided  
42  
43 varying information on when and how to exercise. Lack of information or inconsistent  
44  
45 information was the barrier to exercise for breast cancer patients.

#### 46 47 48 **Facilitators of Exercise**

49  
50 *Accurate Information.* Accurate information on exercise according to the time after  
51  
52 surgery was identified as the key facilitator to promote exercise among patients. The patients  
53  
54 expressed their wish to have some professional consultation regarding exercise interventions  
55  
56 that take their symptoms and health conditions into account.

57  
58  
59 *Encouragement and Support.* In the process of recovery after BCS, patients reported

1  
2  
3  
4 social support as an important factor that motivated them to exercise more. Diverse sources  
5  
6 worked, including medical professionals, exercise therapists, friends, family members, as  
7  
8 well as fellow cancer patients.  
9

10  
11 *“(Other patients in this rehab center says) You have to exercise. Otherwise,*  
12  
13 *it’ll become stiff. Those who have experienced something like myself informed me*  
14  
15 *to do this and that, even regarding how to wash up. It’s a great help from these*  
16  
17 *folks who have been or are going through the similar experiences (treatment*  
18  
19 *processes).. It’s good.”* (Participant #28, PM/ALND, third interview)  
20  
21

22  
23 *First-hand Experience.* The participants reported their first-hand experience as an  
24  
25 important motivator for exercise. They increased the activity level and exercised more after  
26  
27 knowing the positive effects of exercise through experience.  
28

29  
30 *“The more I exercise, the larger this angle becomes. It was really hard to*  
31  
32 *follow the instructions when I wasn’t working out. The more I tried, however, the*  
33  
34 *easier it became. So I realized the importance (of exercise). If I do not exercise, it*  
35  
36 *will be harder. So whenever it pops up in my mind, I try to do some exercise. Even*  
37  
38 *in waking up, I tried to do some arm stretching.”* (Participant #24, TS/SLNB,  
39  
40 second interview)  
41  
42

43  
44 *Sense of Purpose.* All the aforementioned factors contributed to the patients’ sense of  
45  
46 purpose, expecting the benefits of exercise. The expectation included pain reduction, fast  
47  
48 recovery, relapse prevention, and health management. The patients who had mastectomy tried  
49  
50 to motivate themselves to exercise more. In addition, they frequently expressed their wish to  
51  
52 increase physical strength, muscle mass, and flexibility, as well as to maintain a healthy  
53  
54 lifestyle.  
55

56  
57 *“(People say) It takes 3 months to recover from the surgery, but recovery is up*  
58  
59 *to me, I figure. Exercising and building muscles are up to me. So I do exercise.”*  
60

1  
2  
3  
4 (Participants #2, TM/SLNB, third interview)  
5

6 *“I think I got cancer because I had not exercised... There’s no other reason.*  
7  
8 *You know, there’s no known cause for the triple negative breast cancer.. I guess*  
9 *it’s from me not exercising... So I do exercise now, do walking at least.”*  
10  
11  
12

13 (Participant #9, PM /SLNB, second interview)  
14  
15

## 16 **Impact of Timing**

17  
18 During the current study, the participants showed a certain pattern related to the time  
19 after BCS. Diverse factors contributed to the heightened psychological resistance, resulting in  
20 no or minimal exercise, in the early weeks after BCS. However, with the time and support of  
21 professional and social contacts, the patients expressed an increased sense of the purpose of  
22 exercise. Support from external sources, as well as own first-hand experience, produced this  
23 sense of purpose. The motivation along with proper instruction of tailored exercise intervention  
24 is projected to offset the psychological resistance in the early weeks after BCS (Figure 1). This  
25 pattern is consistent with the participants’ actual amount of PA participation, which increased  
26 gradually from immediately after surgery to four weeks after surgery (Table 4).  
27  
28  
29  
30  
31  
32  
33  
34  
35  
36  
37  
38

## 39 **DISCUSSION**

### 40 **Summary of Results**

41  
42 We employed an in-depth interview technique among breast cancer survivors within  
43 one month after BCS and identified the key barriers and facilitators of exercise. Physical  
44 constraints that were prominent in the early weeks, as reported in the literature,<sup>23,24</sup> along with  
45 the pre-existing perception and attitude toward exercise developed psychological resistance to  
46 exercise among the patients. However, an increase in motivation to exercise was observed  
47 among patients in later weeks due to more encouragement from others, as was reported in other  
48 studies,<sup>25-27</sup> and higher sense of purpose from their own experience.  
49  
50  
51  
52  
53  
54  
55  
56  
57  
58

59 This process of increasing the sense of purpose, replacing the psychological resistance,  
60

1  
2  
3  
4 seemed to be propelled by professional intervention conducted at the right time with the correct  
5  
6 exercise. All participants agreed that more accurate information and education were required  
7  
8 to promote exercise. Multiple physical, psychological, and environmental circumstances  
9  
10 served as conditions for psychological resistance among patients. The resistance grounded on  
11  
12 the anxiety and fear of unintended injuries and unanticipated side-effects as a cancer survivor  
13  
14 can only be overcome through professional diagnosis and exercise prescription. The  
15  
16 complementary PA data revealed that patients' sense of purpose was positively associated with  
17  
18 their actual amount of PA participation, reinforcing the requirement for professional  
19  
20 intervention at the right time.  
21  
22  
23  
24

### 25 **Study Limitations and Strengths**

26  
27 This qualitative study included only 33 participants. Hence, generalization of the  
28  
29 results to all breast cancer survivors should be made with caution. Considering that the  
30  
31 recruiting site was one of the major tertiary hospitals in Korea, the lived experiences of people  
32  
33 living in rural areas or those treated in smaller hospitals, for instance, could not be captured in  
34  
35 the current study. Therefore, to advance our understanding regarding the professional  
36  
37 intervention that was identified as the key factor to promote exercise among the participants, a  
38  
39 randomized control study should be performed. The long-term and short-term physical as well  
40  
41 as psychological benefits of exercise can be examined more comprehensively by investigating  
42  
43 the effects of exercise intervention, preferably in a longitudinal study.  
44  
45  
46  
47

48 The strengths of the current study included repeated interviews over four weeks after  
49  
50 surgery which enabled us to observe the change in patients' attitude toward exercise over time.  
51  
52 Especially, in the current study, breast cancer patients were interviewed from only one week  
53  
54 after surgery before implementation of exercise or rehabilitation intervention; however, recent  
55  
56 studies have reported the importance of early exercise intervention after surgery in cancer  
57  
58 patients.  
59  
60

## Clinical Implications

To mitigate the constant feedback loop between physical and psychological excuses, a tailored exercise intervention, considering patients physical and psychological conditions, should be designed. Considering the diverse anxiety expressed in the current study, tailored programs should consider each patient's physical and psychological needs to optimize the potential effects of the program.

Many breast cancer patients do not participate in PA and experience significant muscle mass loss during the first few months after surgery, which is associated with increased risk of type 2 diabetes and worse prognosis, including increased risk of recurrence.<sup>28, 29</sup> The findings of the current study revealed that breast cancer patients can benefit from early participation of exercise and PA, which may prevent loss of shoulder ROM and strength after BCS. Therefore, the importance of exercise needs to be emphasized and educated, not only among the patients but also among the health care professionals so that their recommendations to the patients can have real impact in changing motivation as well as behavior. In addition, the current study provides information regarding the attitude of breast cancer patients toward exercise during the early recovery stage after surgery and thus, promotes the development of appropriate intervention strategies.

## Conclusions

Thirty-three breast cancer survivors shared their experience and thoughts regarding exercise after BCS. Commonly expressed needs of the participants were summed as a professional intervention that takes into account the time after surgery and each individual's physical condition. Exercise was not only a matter of motivation and will power, but also a matter of resources that can be used with physical and psychological comfort.



### **Contributorship statement**

SJY and JYJ participated in study design. SJY, JHM, JYK, SIK and JYJ participated in data collection. SJY, ASJ, JHM, JYB, JYK, SHP, SIK and JYJ participated in data analysis and interpretation. ASJ, SJY, CWL, YJY, JMH and JYJ participated in the manuscript writing. All authors participated in the manuscript review and revision. All authors thank participants of the study and research coordinators at the Yonsei Cancer Center.

### **Competing interests**

None declared.

### **Funding**

This work was supported by the National Research Foundation of Korea grant number NRF-2017S1A5A2A01024689, NRF-2021S1A5B5A16077404, the National R&D Program for Cancer Control, Ministry of Health and Welfare, Republic of Korea (2021-11-0778), the National R&D Program for Cancer Control, Ministry of Health and Welfare, Republic of Korea (HA21C0067000021), and the Yonsei Signature Research Cluster Program 2021-22-0009.

### **Data sharing statement**

Data are available upon reasonable request. Interview transcripts will be available upon request on the specific area of interest.

Figure 1. Relations among categories according to time, which changes the weight of the barriers and facilitators of exercise

## References:

1. Cancer.go.kr [homepage on the internet]. National Cancer Information Center: Ministry of Health and Welfare; [Cited 2021 January 9]. Available from: <https://www.cancer.go.kr/>
2. Hong S, Won Y, Park Y, Jung K, Kong H, Lee E. Cancer statistics in Korea: incidence, mortality, survival, and prevalence in 2017. *Cancer Res Treat*. 2020;52(2):335-350.
3. Nccn.org [homepage on the internet]. National Comprehensive Cancer Network; [Cited 2021 Jun 8]. Available from: [https://www.nccn.org/professionals/physician\\_gls/pdf/breast.pdf](https://www.nccn.org/professionals/physician_gls/pdf/breast.pdf)
4. Ebaugh D, Spinelli B, Schmitz KH. Shoulder impairments and their association with symptomatic rotator cuff disease in breast cancer survivors. *Med Hypotheses*. 2011;77(4):481-487.
5. Fabro EAN, Bergmann A, e Silva BdA, Ribeiro ACP, de Souza Abrahão K, Ferreira MGDCL, et al. Post-mastectomy pain syndrome: incidence and risks. *The Breast*. 2012;21(3):321-325.
6. Hayes SC, Johansson K, Stout NL, Prosnitz R, Armer JM, Gabram S, et al. Upper-body morbidity after breast cancer: incidence and evidence for evaluation, prevention, and management within a prospective surveillance model of care. *Cancer*. 2012;118(S8):2237-2249.
7. Golden-Kreutz DM, Andersen BL. Depressive symptoms after breast cancer surgery: Relationships with global, cancer-related, and life event stress. *Psychooncology*. 2004;13(3):211-220.
8. Spei M-E, Samoli E, Bravi F, La Vecchia C, Bamia C, Benetou V. Physical activity in breast cancer survivors: A systematic review and meta-analysis on overall and breast cancer survival. *The Breast*. 2019;44:144-152.
9. Ten Wolde B, Kuiper M, de Wilt JH, Strobbe LJ. Postoperative complications after breast cancer surgery are not related to age. *Ann Surg Oncol*. 2017;24(7):1861-1867.
10. Sagen A, Kaaresen R, Sandvik L, Thune I, Risberg MA. Upper limb physical function and adverse effects after breast cancer surgery: a prospective 2.5-year follow-up study and preoperative measures. *Arch Phys Med Rehabil*. 2014;95(5):875-881.
11. Lacomba MT, Sánchez MJY, Goñi ÁZ, Merino DP, del Moral OM, Téllez EC, et al. Effectiveness of early physiotherapy to prevent lymphoedema after surgery for breast cancer: randomised, single blinded, clinical trial. *BMJ*. 2010;340:b5396.
12. Cinar N, Seckin Ü, Keskin D, Bodur H, Bozkurt B, Cengiz Ö. The effectiveness of early rehabilitation in patients with modified radical mastectomy. *Cancer Nurs*. 2008;31(2):160-165.
13. Möller UO, Beck I, Rydén L, Malmström M. A comprehensive approach to rehabilitation interventions following breast cancer treatment-a systematic review of systematic reviews. *BMC cancer*. 2019;19(1):1-20.
14. Andrade RD, Junior GJF, Capistrano R, Beltrame TS, Pelegrini A, Crawford DW, et al. Constraints to leisure-time physical activity among Brazilian workers. *Ann Leis Res*. 2019;22(2):202-214.
15. Payán DD, Sloane DC, Illum J, Lewis LB. Intrapersonal and environmental barriers to physical activity among Blacks and Latinos. *J Nutr Educ Behav*. 2019;51(4):478-485.

16. Son JS, Chen G, Liechty T, Janke MC, West ST, Wong JD, et al. The Role of Facilitators in the Constraint Negotiation of Leisure-Time Physical Activity. *Leis Sci.* 2021;1-20.
17. Patton MQ. *Qualitative evaluation and research methods.* SAGE Publications, Inc; 1990.
18. Guest G, Bunce A, Johnson L. How many interviews are enough? An experiment with data saturation and variability. *Field methods.* 2006;18(1):59-82.
19. Armstrong T, Bull F. Development of the world health organization global physical activity questionnaire (GPAQ). *J Public Health.* 2006;14(2):66-70.
20. Lee J, Lee C, Min J, Kang D-W, Kim J-Y, Yang HI, et al. Development of the Korean Global Physical Activity Questionnaire: reliability and validity study. *Glob Health Promot.* 2020;27(3):44-55.
21. Lincoln YS, Guba EG. *Naturalistic inquiry.* Sage; 1985.
22. Corbin J, Strauss A. *Basics of Qualitative Research: Techniques and Procedures for Developing Grounded Theory.* Sage Publications; 1998.
23. Shamley D, Srinaganathan R, Oskrochi R, Lascrain-Aguirrebeña I, Sugden E. Three-dimensional scapulothoracic motion following treatment for breast cancer. *Breast Cancer Res Treat.* 2009;118(2):315-322.
24. Baron RH, Kelvin JF, Bookbinder M, Cramer L, Borgen PI, Thaler HT. Patients' sensations after breast cancer surgery: a pilot study. *Cancer Practice.* 2000;8(5):215-222.
25. Abe M, Iwase T, Takeuchi T, Murai H, Miura S. A randomized controlled trial on the prevention of seroma after partial or total mastectomy and axillary lymph node dissection. *Breast cancer.* 1998;5(1):67-69.
26. Gillis C, Li C, Lee L, Awasthi R, Augustin B, Gamsa A, et al. Prehabilitation versus rehabilitation: a randomized control trial in patients undergoing colorectal resection for cancer. *Anesthesiology.* 2014;121(5):937-947.
27. Jones LW, Courneya KS, Fairey AS, Mackey JR. Effects of an oncologist's recommendation to exercise on self-reported exercise behavior in newly diagnosed breast cancer survivors: a single-blind, randomized controlled trial. *Ann Behav Med.* 2004;28(2):105-113.
28. Pan K, Chlebowski RT, Mortimer JE, Gunther MJ, Rohan T, Vitolins MZ, et al. Insulin resistance and breast cancer incidence and mortality in postmenopausal women in the Women's Health Initiative. *Cancer.* 2020;126(16):3638-3647.
29. Caan BJ, Feliciano EMC, Prado CM, Alexeeff S, Kroenke CH, Bradshaw P, et al. Association of muscle and adiposity measured by computed tomography with survival in patients with nonmetastatic breast cancer. *JAMA Oncol.* 2018;4(6):798-804.

1  
2  
3  
4  
5  
6  
7  
8  
9  
10  
11  
12  
13  
14  
15  
16  
17  
18  
19  
20  
21  
22  
23  
24  
25  
26  
27  
28  
29  
30  
31  
32  
33  
34  
35  
36  
37  
38  
39  
40  
41  
42  
43  
44  
45  
46

For peer review only

1  
2  
3  
4  
5  
6  
7  
8  
9  
10  
11  
12  
13  
14  
15  
16  
17  
18  
19  
20  
21  
22  
23  
24  
25  
26  
27  
28  
29  
30  
31  
32  
33  
34  
35  
36  
37  
38  
39  
40  
41  
42  
43  
44  
45  
46

Figure 1. Relations among categories according to time, which changes the weight of the barriers and facilitators of exercise



## COREQ (COnsolidated criteria for REporting Qualitative research) Checklist

A checklist of items that should be included in reports of qualitative research. You must report the page number in your manuscript where you consider each of the items listed in this checklist. If you have not included this information, either revise your manuscript accordingly before submitting or note N/A

| Topic                                          | Item No. | Guide Questions/Description                                                                                                                                 | Reported on Page No. |
|------------------------------------------------|----------|-------------------------------------------------------------------------------------------------------------------------------------------------------------|----------------------|
| <b>Domain 1: Research team and reflexivity</b> |          |                                                                                                                                                             |                      |
| <i>Personal characteristics</i>                |          |                                                                                                                                                             |                      |
| Interviewer/facilitator                        | 1        | Which author/s conducted the interview or focus group?                                                                                                      | 7                    |
| Credentials                                    | 2        | What were the researcher's credentials?<br>e.g. PhD, MD                                                                                                     | 1                    |
| Occupation                                     | 3        | What was their occupation at the time of the study?                                                                                                         | 7                    |
| Gender                                         | 4        | Was the researcher male or female?                                                                                                                          | -                    |
| Experience and training                        | 5        | What experience or training did the researcher have?                                                                                                        | 7                    |
| <i>Relationship with participants</i>          |          |                                                                                                                                                             |                      |
| Relationship established                       | 6        | Was a relationship established prior to study commencement?                                                                                                 | 5                    |
| Participant knowledge of the interviewer       | 7        | What did the participants know about the researcher?<br>e.g. personal goals, reasons for doing the research                                                 | --                   |
| Interviewer characteristics                    | 8        | What characteristics were reported about the interviewer/facilitator?<br>e.g. Bias, assumptions, reasons and interests in the research topic                | 7                    |
| <b>Domain 2: Study design</b>                  |          |                                                                                                                                                             |                      |
| <i>Theoretical framework</i>                   |          |                                                                                                                                                             |                      |
| Methodological orientation and Theory          | 9        | What methodological orientation was stated to underpin the study?<br>e.g. grounded theory, discourse analysis, ethnography, phenomenology, content analysis | 8                    |
| <i>Participant selection</i>                   |          |                                                                                                                                                             |                      |
| Sampling                                       | 10       | How were participants selected?<br>e.g. purposive, convenience, consecutive, snowball                                                                       | 5                    |
| Method of approach                             | 11       | How were participants approached?<br>e.g. face-to-face, telephone, mail, email                                                                              | 5                    |
| Sample size                                    | 12       | How many participants were in the study?                                                                                                                    | 5                    |
| Non-participation                              | 13       | How many people refused to participate or dropped out?<br>Reasons?                                                                                          | 5                    |
| <i>Setting</i>                                 |          |                                                                                                                                                             |                      |
| Setting of data collection                     | 14       | Where was the data collected?<br>e.g. home, clinic, workplace                                                                                               | 6                    |
| Presence of non-participants                   | 15       | Was anyone else present besides the participants and researchers?                                                                                           | 6                    |
| Description of sample                          | 16       | What are the important characteristics of the sample?<br>e.g. demographic data, date                                                                        | Table2               |

| Topic                                  | Item No. | Guide Questions/Description                                                                                                     | Reported on Page No. |
|----------------------------------------|----------|---------------------------------------------------------------------------------------------------------------------------------|----------------------|
| <i>Data collection</i>                 |          |                                                                                                                                 |                      |
| Interview guide                        | 17       | Were questions, prompts, guides provided by the authors? Was it pilot tested?                                                   | Table 1              |
| Repeat interviews                      | 18       | Were repeat interviews carried out? If yes, how many?                                                                           | 6                    |
| Audio/visual recording                 | 19       | Did the research use audio or visual recording to collect the data?                                                             | 6                    |
| Field notes                            | 20       | Were field notes made during and/or after the interview or focus group?                                                         | 6                    |
| Duration                               | 21       | What was the duration of the interviews or focus group?                                                                         | 6                    |
| Data saturation                        | 22       | Was data saturation discussed?                                                                                                  | 5                    |
| Transcripts returned                   | 23       | Were transcripts returned to participants for comment and/or correction?                                                        | 7-8                  |
| <b>Domain 3: analysis and findings</b> |          |                                                                                                                                 |                      |
| <i>Data analysis</i>                   |          |                                                                                                                                 |                      |
| Number of data coders                  | 24       | How many data coders coded the data?                                                                                            | 8                    |
| Description of the coding tree         | 25       | Did authors provide a description of the coding tree?                                                                           | Table 3              |
| Derivation of themes                   | 26       | Were themes identified in advance or derived from the data?                                                                     | 8                    |
| Software                               | 27       | What software, if applicable, was used to manage the data?                                                                      | N/A                  |
| Participant checking                   | 28       | Did participants provide feedback on the findings?                                                                              | 7-8                  |
| <i>Reporting</i>                       |          |                                                                                                                                 |                      |
| Quotations presented                   | 29       | Were participant quotations presented to illustrate the themes/findings? Was each quotation identified? e.g. participant number | 12-15                |
| Data and findings consistent           | 30       | Was there consistency between the data presented and the findings?                                                              | 8-15                 |
| Clarity of major themes                | 31       | Were major themes clearly presented in the findings?                                                                            | 8-15<br>Table 3      |
| Clarity of minor themes                | 32       | Is there a description of diverse cases or discussion of minor themes?                                                          | 15-16<br>Table 3     |

Developed from: Tong A, Sainsbury P, Craig J. Consolidated criteria for reporting qualitative research (COREQ): a 32 item checklist for interviews and focus groups. *International Journal for Quality in Health Care*. 2007. Volume 19, Number 6: pp. 349–35
